1  
2  
3  
4  
5  
6  
7  
8  
9  
10  
11  
12  
13  
14  
15  
16  
17  
18  
19  
20  
21  
22  
23  
24  
25  
26  
27  
28

**A resource-rational theory of set size effects in visual working memory**

Ronald van den Berg<sup>1</sup> and Wei Ji Ma<sup>2</sup>

<sup>1</sup>Department of Psychology, University of Uppsala, Uppsala, Sweden.

<sup>2</sup>Center for Neural Science and Department of Psychology, New York University, New York, USA

29 **ABSTRACT**

30  
31 **Encoding precision in visual working memory decreases with the number of encoded items.**  
32 **Here, we propose a normative theory for such set size effects: the brain minimizes a**  
33 **weighted sum of an error-based behavioral cost and a neural encoding cost. We construct a**  
34 **model from this theory and find that it predicts set size effects. Notably, these effects are**  
35 **mediated by probing probability, which aligns with previous empirical findings. The model**  
36 **accounts well for effects of both set size and probing probability on encoding precision in**  
37 **nine delayed-estimation experiments. Moreover, we find support for the prediction that the**  
38 **total amount of invested resource can vary non-monotonically with set size. Finally, we**  
39 **show that it is sometimes optimal to encode only a subset or even none of the relevant items**  
40 **in a task. Our findings raise the possibility that cognitive “limitations” arise from rational**  
41 **cost minimization rather than from constraints.**

42  
43 **Keywords**

44 Visual working memory, set size effects, resource rationality, cost function, normative models

45  
46  
47  
48  
49

## 50 INTRODUCTION

51 A well-established property of visual working memory (VWM) is that the precision with which  
52 items are encoded decreases with the number of encoded items (Ma et al. 2014; Luck & Vogel  
53 2013). A common way to explain this set size effect has been to assume that there is a fixed  
54 amount of resource available for encoding: the more items, the less resource per item and,  
55 therefore, the lower the precision per item. Different forms have been proposed for this encoding  
56 resource, such as samples (Palmer 1994; Sewell et al. 2014), Fisher information (Van Den Berg  
57 et al. 2012; Keshvari et al. 2013), and neural firing rate (Bays 2014). Unless additional  
58 assumptions are made, models with a fixed amount of resource generally predict that the  
59 encoding precision per item (defined as inverse variance of the encoding error) is inversely  
60 proportional to set size. It has turned out that this prediction is often inconsistent with empirical  
61 data, which is the reason that more recent studies instead use a power law to describe set size  
62 effects (Bays et al. 2009; Bays & Husain 2008; Van Den Berg et al. 2012; van den Berg et al.  
63 2014; Devkar & Wright 2015; Elmore et al. 2011; Mazyar et al. 2012; Wilken & Ma 2004;  
64 Donkin et al. 2016; Keshvari et al. 2013). In the more flexible power-law models, the total  
65 amount of resource across all items is no longer fixed, but instead decreases or increases  
66 monotonically with set size. These models tend to provide excellent fits to experimental data, but  
67 they have been criticized for lacking a principled motivation (Oberauer et al. 2016; Oberauer &  
68 Lin 2017): they accurately describe *how* memory precision depends on set size, but not *why* these  
69 effects are best described by a power law – or why they exist at all. In the present study, we seek  
70 a *normative* answer to these fundamental questions.

71 While previous studies have used normative theories to account for certain aspects of  
72 VWM, none of them has accounted for set size effects in a principled way. Examples include our  
73 own previous work on change detection (Keshvari et al. 2012; Keshvari et al. 2013), change  
74 localization (Van Den Berg et al. 2012), and visual search (Mazyar et al. 2012). In those studies,  
75 we modelled the decision stage using optimal-observer theory, but assumed an ad hoc power law  
76 to model the relation between encoding precision and set size. Another example is the work by  
77 Sims and colleagues, who developed a normative framework in which working memory is  
78 conceptualized as an optimally performing information channel (Sims 2016; Sims et al. 2012).  
79 Their information-theoretic framework offers parsimonious explanations for the relation between  
80 stimulus variability and encoding precision (Sims et al. 2012) and the non-Gaussian shape of

81 encoding noise (Sims 2015). However, it does not offer a normative explanation of set size  
82 effects. In their early work (Sims et al. 2012) they accounted for these effects by assuming that  
83 total information capacity is fixed, which is similar to other fixed-resource models and predicts an  
84 inverse proportionality between encoding precision and set size. In their later work (Orhan et al.  
85 2014; Sims 2016), they add to this the assumption that there is an inefficiency in distributing  
86 capacity across items and fit capacity as a free parameter at each set size. Neither of these  
87 assumptions has a normative motivation. Finally, Nassar and colleagues have proposed a  
88 normative model in which a strategic trade-off is made between the number of encoded items and  
89 their precision: when two items are very similar, they are encoded as a single item, such that there  
90 is more resource available per encoded item (Nassar et al. 2018). They showed that this kind of  
91 “chunking” is rational from an information-theoretical perspective, because it minimizes the  
92 observer’s expected estimation error. However, just as in much of the work discussed above, this  
93 theory assumes a fixed resource budget for item encoding, which is not necessarily optimal when  
94 resource usage is costly.

95         The approach that we take here aligns with the recent proposal that cognitive systems are  
96 “resource-rational”, i.e., trade off the cost of utilizing resources against expected task  
97 performance (Griffiths et al. 2015). The starting point of our theory is the principle that neural  
98 coding is costly (Attwell & Laughlin 2001; Lennie 2003; Sterling & Laughlin 2015), which may  
99 have pressured the brain to trade off the behavioral benefits of high precision against the cost of  
100 the resource invested in stimulus encoding (Pestilli & Carrasco 2005; Lennie 2003; Ma & Huang  
101 2009; Christie & Schrater 2015). We hypothesize that set size effects – and limitations in VWM  
102 in general – may be the result of making this trade-off near-optimally. We formalize this  
103 hypothesis in a general model that can be applied to a broad range of tasks, analyze the  
104 theoretical predictions of this model, and fit it to data from nine previous delayed-estimation  
105 experiments.

106

## 107 **THEORY**

108

### 109 **General theoretical framework: trade-off between behavioral and neural cost**

110 We define a vector  $\mathbf{Q}=\{Q_1,\dots, Q_N\}$  that specifies the amount of resource with which each of  $N$   
111 task-relevant items is encoded. We postulate that  $\mathbf{Q}$  affects two types of cost: an expected

112 behavioral cost  $\bar{C}_{\text{behavioral}}(\mathbf{Q})$  induced by task errors and an expected neural cost  $\bar{C}_{\text{neural}}(\mathbf{Q})$   
113 induced by spending neural resources on encoding. The *expected total cost* is a weighted  
114 combination,

115  
116 
$$\bar{C}_{\text{total}}(\mathbf{Q}; \lambda) = \bar{C}_{\text{behavioral}}(\mathbf{Q}) + \lambda \bar{C}_{\text{neural}}(\mathbf{Q}), \quad (1)$$

117  
118 where the weight  $\lambda \geq 0$  represents the importance of the neural cost relative to the behavioral cost.  
119 Generally, increasing the amount of resource spent on encoding will reduce the expected  
120 behavioral cost, but simultaneously increase the expected neural cost.

121 The key novelty of our theory is that instead of assuming that there is a fixed resource  
122 budget for stimulus encoding (a hard constraint), we postulate that the brain – possibly on a trial-  
123 by-trial basis – chooses its resource vector  $\mathbf{Q}$  in a manner that minimizes the expected total cost.  
124 We denote the vector that yields this minimum by  $\mathbf{Q}_{\text{optimal}}$ :

125  
126 
$$\mathbf{Q}_{\text{optimal}} = \underset{\mathbf{Q}}{\operatorname{argmin}} \bar{C}_{\text{total}}(\mathbf{Q}; \lambda). \quad (2)$$

127  
128 Under this policy, the total amount of invested resource – the sum of the elements of  $\mathbf{Q}_{\text{optimal}}$  –  
129 does not need to be fixed: when it is “worth it” (i.e., when investing more resource reduces the  
130 expected behavioral cost more than it increases the expected neural cost), more resource may be  
131 invested.

132 Eqs. (1) and (2) specify the theory at the most general level. To derive testable predictions  
133 from this framework, we next propose specific formalizations of resource and of the two expected  
134 cost functions.

135  
136 **Formalization of resource**

137 As in our previous work (Keshvari et al. 2012; Keshvari et al. 2013; Mazyar et al. 2012; Van Den  
138 Berg et al. 2012; van den Berg et al. 2014), we quantify encoding precision as Fisher information,  
139  $J$ . This measure provides a lower bound on the variance of any unbiased estimator (Cover &  
140 Thomas 2005; Ly, A. et al. 2015) and is a common tool in the study of theoretical limits on  
141 stimulus coding and discrimination (Abbott & Dayan 1999). Moreover, we assume that there is

142 item-to-item and trial-to-trial variation in precision (Fougnie et al. 2012; Van Den Berg et al.  
143 2012; van den Berg et al. 2014; Keshvari et al. 2013; van den Berg et al. 2017). Following  
144 previous work (e.g., (Van Den Berg et al. 2012; van den Berg et al. 2014)), we model this  
145 variability using a gamma distribution with a mean  $\bar{J}$  and shape parameter  $\tau \geq 0$  (larger  $\tau$  means  
146 more variability); we denote this distribution by  $\text{Gamma}(J; \bar{J}, t)$ .

147 We specify resource vector  $\mathbf{Q}$  as the vector with mean encoding precisions,  $\bar{\mathbf{J}}$ , such that  
148 the general theory specified by Eqs. (1) and (2) modifies to

149  
150 
$$\bar{C}_{\text{total}}(\bar{\mathbf{J}}; \lambda, \tau) = \bar{C}_{\text{behavioral}}(\bar{\mathbf{J}}; \tau) + \lambda \bar{C}_{\text{neural}}(\bar{\mathbf{J}}; \tau) \quad (3)$$

151  
152 and

153 
$$\bar{\mathbf{J}}_{\text{optimal}} = \underset{\bar{\mathbf{J}}}{\text{argmin}} \bar{C}_{\text{total}}(\bar{\mathbf{J}}; \lambda, \tau). \quad (4)$$

154 In this formulation, it is assumed that the brain has control over resource vector  $\bar{\mathbf{J}}$ , but not over  
155 the variability in how much resource is actually assigned to an item. However, our choice to  
156 incorporate variability in  $J$  is empirically motivated and not central to the theory: parameter  $\tau$   
157 mainly affects the kurtosis of the predicted estimation error distributions, not the variance of these  
158 distributions or the way that the variance depends on set size (which is the focus of this paper).  
159 We will show that the theory also predicts set size effects when there is no variability in  $J$ .

160  
161 **Formalization of expected neural cost**

162 To formalize the neural cost function, we make two general assumptions. First, we assume that  
163 the expected total neural cost is the sum of the expected neural costs associated with the  $N$   
164 individual items. Second, we assume that each of these “local” neural costs has the same  
165 functional dependence on the amount of allocated resource: if two items are encoded with the  
166 same amount of resource, they induce equal amounts of neural cost. Combining these  
167 assumptions, the expected neural cost induced by encoding  $N$  items with resource  
168  $\bar{\mathbf{J}} = \{\bar{J}_1, \dots, \bar{J}_N\}$  takes the form

169 
$$\bar{C}_{\text{neural}}(\bar{\mathbf{J}}; \tau) = \sum_{i=1}^N \bar{c}_{\text{neural}}(\bar{J}_i; \tau), \quad (5)$$

170 where we introduced the convention to denote local costs (associated with a single item) with  
 171 small  $c$ , to distinguish them from the global costs (associated with the entire set of encoded  
 172 items), which we denote with capital  $C$ .

173 The expected local neural cost induced by encoding an item with resource  $\bar{J}$  is obtained  
 174 by integrating the amount of local neural cost induced by investing an amount of resource  $J$ ,  
 175 which we will denote by  $c_{\text{neural}}(J)$ , over  $J$ ,

176 
$$\bar{c}_{\text{neural}}(\bar{J}; \tau) = \int c_{\text{neural}}(J) \text{Gamma}(J; \bar{J}, \tau) dJ, \quad (6)$$

177  
 178 The theory is agnostic about the exact nature of the cost function  $c_{\text{neural}}(J)$ : it could include  
 179 spiking and non-spiking components (Lennie 2003), be associated with activity in both sensory  
 180 and non-sensory areas, and include other types of cost that are linked to “mental effort” in general  
 181 (Shenhav et al. 2017).

182 To motivate a specific form of this function, we consider the case that the neural cost is  
 183 incurred by spiking activity. For many choices of spike variability, including the common one of  
 184 Poisson-like variability (Ma et al. 2006), Fisher information  $J$  of a stimulus encoded in a neural  
 185 population is proportional to the trial-averaged neural spiking rate (Paradiso 1988; Seung &  
 186 Sompolinsky 1993). If we further assume that each spike has a fixed cost, we find that the local  
 187 neural cost induced by each item is proportional to  $J$ ,

188 
$$c_{\text{neural}}(J; \alpha) = \alpha J, \quad (7)$$

189  
 190 where  $\alpha$  is the amount of neural cost incurred by a unit increase in resource. Combining Eqs. (5)-  
 191 (7) yields

192 
$$\bar{C}_{\text{neural}}(\bar{\mathbf{J}}; \alpha) = \alpha \sum_{i=1}^N \bar{J}_i. \quad (8)$$

193  
 194 Hence, the global expected neural cost is proportional to the total amount of invested resource  
 195 and independent of the amount of variability in  $J$ .

## 196 **Formalization of expected behavioral cost for local tasks**

197 Before we specify the expected behavioral cost function, we introduce a distinction between two  
198 classes of tasks. First, we define a task as “local” if the observer’s response depends on only one  
199 of the encoded items. Examples of local tasks are delayed estimation (Blake et al. 1997;  
200 Prinzmetal et al. 1998; Wilken & Ma 2004), single-probe change detection (Todd & Marois  
201 2004; Luck & Vogel 1997), and single-probe change discrimination (Klyszejko et al. 2014). By  
202 contrast, when the task response depends on all memorized items, we define the task as “global”.  
203 Examples of global tasks are whole-display change detection (Luck & Vogel 1997; Keshvari et  
204 al. 2013), change localization (Van Den Berg et al. 2012), and delayed visual search (Mazyar et  
205 al. 2012). The theory that we developed up to this point – Eqs. (1) to (8) – applies to both global  
206 and local tasks. However, from here on, we developed our theory in the context of local tasks  
207 only; we will come back to global tasks at the end of Results.

208 Since in local tasks only one item gets probed, the total expected behavioral cost is a  
209 weighted average of expected costs associated with individual items,

$$210 \quad \bar{C}_{\text{behavioral}}(\bar{\mathbf{J}}; \tau) = \sum_{i=1}^N p_i \bar{c}_{\text{behavioral},i}(\bar{J}_i; \tau), \quad (9)$$

211  
212 where  $p_i$  is the experimentally determined probing probability of the  $i^{\text{th}}$  item and  $\bar{c}_{\text{behavioral},i}(\bar{J}_i; t)$  is  
213 the local expected behavioral cost associated with reporting the  $i^{\text{th}}$  item. The only remaining step  
214 is to specify  $\bar{c}_{\text{behavioral},i}(\bar{J}_i; t)$ . This function is task specific and we will specify it after we have  
215 described the task to which we apply the model.

216

## 217 **A resource-rational model for local tasks**

218 Combining Eqs. (3), (8), and (9) yields the following expected total cost function for local tasks:

219

$$220 \quad \bar{C}_{\text{total}}(\bar{\mathbf{J}}; \alpha, \lambda, \tau) = \sum_{i=1}^N p_i \bar{c}_{\text{behavioral}}(\bar{J}_i; \tau) + \alpha \lambda \sum_{i=1}^N \bar{J}_i. \quad (10)$$

221

222 Since parameters  $\alpha$  and  $\lambda$  have interchangeable effects on the model predictions, we will fix  $\alpha=1$   
223 and only treat  $\lambda$  as a free parameter.



224 We recognize that the right-hand side of Eq. (10) is a sum of independent “local”  
 225 expected total costs. Therefore, each element of  $\bar{\mathbf{J}}_{\text{optimal}}$ , Eq. (4), can be computed independently  
 226 of the other elements, by minimizing the local expected total cost for each item,

$$227$$

$$228 \quad \bar{J}_{\text{optimal},i}(p_i; \lambda, \tau) = \underset{\bar{J}}{\operatorname{argmin}} \left( p_i \bar{c}_{\text{behavioral}}(\bar{J}; \tau) + \lambda \bar{J} \right). \quad (11)$$

229

230 This completes the specification of the general form of our resource-rational model for local  
 231 tasks. Its free parameters are  $\lambda$  and  $\tau$ .

232

233 **Set size effects result from cost minimization and are mediated by probing probability**

234 To obtain an understanding of the model predictions, we mathematically analyze how  $\bar{J}_{\text{optimal}}$   
 235 depends on probing probability and set size. We perform this analysis under two very general  
 236 assumptions about the expected behavioral cost function: first, it monotonically decreases with  $\bar{J}$   
 237 (i.e., increasing resource reduces the expected behavioral cost) and, second, it satisfies a law of  
 238 diminishing returns (i.e., the reductions per unit increase of resource decrease with the total  
 239 amount of already invested resource). As proven in the Supplementary Information, under these  
 240 assumptions the domain of  $p_i$  consists of three potential regimes, corresponding to different  
 241 encoding strategies (Fig. 1A). First, there might exist a regime  $0 \leq p_i < p_0$  in which it is optimal to  
 242 not encode an item,  $\bar{J}_{\text{optimal}} = 0$ . In this regime, the probing probability of an item is so low that  
 243 investing any amount of resource can never reduce the expected behavioral cost by more than it  
 244 increases the expected neural cost. Second, there might exist a regime  $p_0 \leq p_i < p_\infty$  in which it is  
 245 optimal to encode an item with a finite amount of resource,  $\bar{J}_{\text{optimal}} \in (0, \infty)$ . In this regime,  $\bar{J}_{\text{optimal}}$   
 246 increases as a function of  $p_i$ . Finally, there may be a regime  $p_\infty \leq p_i \leq 1$  in which the optimal strategy  
 247 is to encode the item with an infinite amount of resource,  $\bar{J}_{\text{optimal}} = \infty$ . This last regime will only  
 248 exist in extreme cases, such as when there is no neural cost associated with encoding. The  
 249 threshold  $p_0$  depends on the importance of the neural cost,  $\lambda$ , and on the derivative of the

250 expected behavioral cost evaluated at  $\bar{J} = 0$ ; specifically,  $p_0 = \frac{\lambda}{|\bar{c}'_{\text{behavioral}}(0)|}$ . The threshold  $p_\infty$

251 depends on  $\lambda$  and on the derivative of the expected behavioral cost evaluated at  $\bar{J} \rightarrow \infty$ ;

252 specifically, 
$$p_\infty = \frac{\lambda}{|\bar{c}_{\text{behavioral}}'(\infty)|}.$$

253 We next turn to set size effects. An interesting property of the model is that  $\bar{J}_{\text{optimal}}$  only  
 254 depends on the probing probability,  $p_i$ , and on the model parameters – it does *not* explicitly  
 255 depend on set size,  $N$ . Therefore, the only way that it can predict set size effects is through a  
 256 coupling between  $N$  and  $p_i$ . Such a coupling exists in most studies that use a local task. For  
 257 example, in delayed-estimation tasks, each item is usually equally likely to be probed such that  
 258  $p_i=1/N$ . For those experiments, the above partitioning of the domain of  $p_i$  translates to a similar  
 259 partitioning of the domain of  $N$  (Fig. 1B). Then, a set size  $N_\infty \geq 0$  may exist below which it is  
 260 optimal to encode items with infinite resource, a region  $N_\infty \leq N < N_0$  in which it is optimal to encode  
 261 items with a finite amount of resource, and a region  $N > N_0$  in which it is optimal to not encode  
 262 items at all.

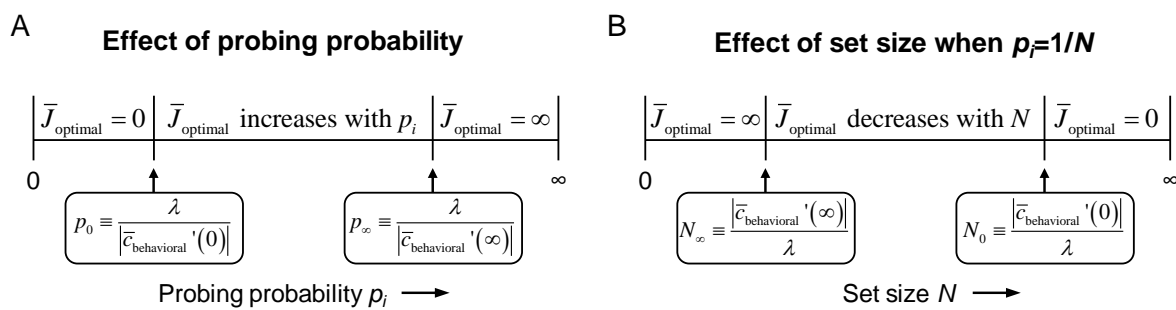

**Figure 1. Effects of probing probability and set size on  $\bar{J}_{\text{optimal}}$  in the resource-rational model for local tasks.** (A) The model has three different optimal solutions depending on probing probability  $p_i$ : invest no resource when  $p_i$  is smaller than some threshold value  $p_0$ , invest infinite resource when  $p_i$  is larger than  $p_\infty$ , and invest a finite amount of resource when  $p_0 < p_i < p_\infty$ . (B) The domain of  $N$  partitions in a similar manner for tasks in which  $p_i=1/N$ .

263

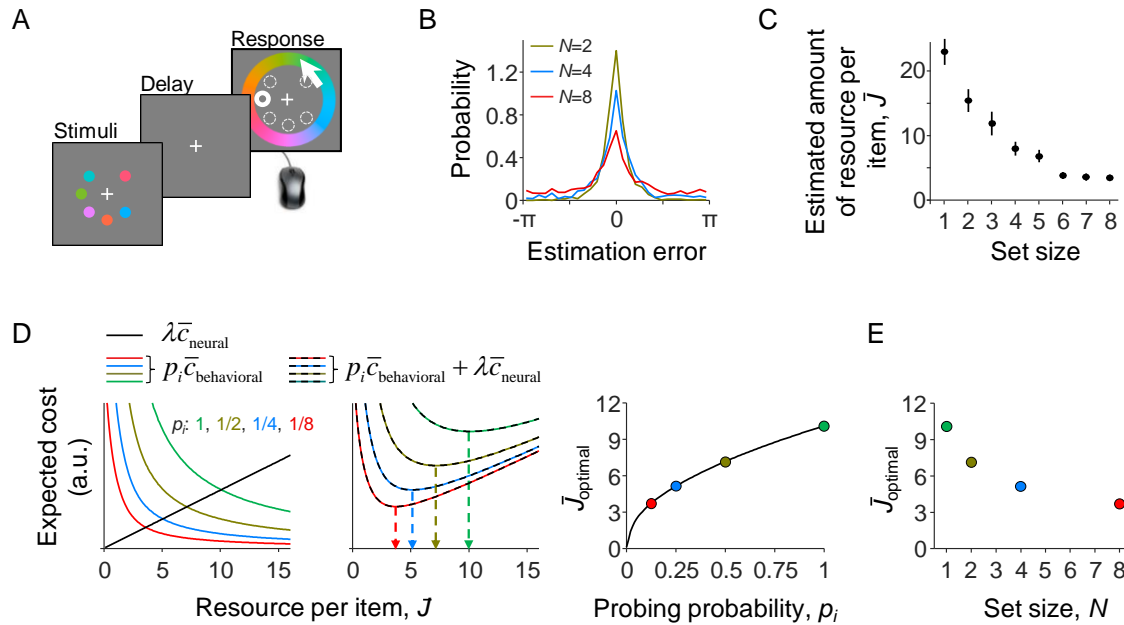

**Figure 2. A resource-rational model for delayed-estimation tasks.** (A) Example of a trial in a delayed-estimation experiment. The subject is briefly presented with a set of stimuli and, after a short delay, reports the value of the item at a randomly chosen location (here indicated with thick circle). (B) The distribution of estimation errors in delayed-estimation experiments typically widens with set size (data from Experiment E5 in Table 1). (C) This set size effect can be explained as a decrease in the amount of resource per encoded item. The estimated amount of resource per item was computed using the same non-parameter model as in 3C. (D) Expected cost under four different probing probabilities (model parameters:  $\lambda=0.001$ ,  $\beta=2$ ,  $\tau \downarrow 0$ ). *Left:* The local expected behavioral cost multiplied by  $p_i$  (colored curves) decreases with the amount of invested resource, while the expected neural cost increases (black line). *Center:* The sum of these two costs has a unique minimum, whose location (arrows) depends on probing probability  $p_i$ . *Right:* The optimal amount of resource per item increases with the probability that the item will be probed. (E) The optimal amount of resource per item from panel C replotted as a function of set size,  $N$ , for a task in which all items are equally likely to be probed, i.e.,  $p_i=1/N$ . The predicted set size effect is qualitatively similar to set size effects observed in empirical data (cf. panel C).

264

265

## 266 RESULTS

267

### 268 Model predictions for delayed estimation tasks

269 To test the predictions of the model against empirical data, we apply it to the delayed estimation  
 270 task (Wilken & Ma 2004; Blake et al. 1997; Prinzmetal et al. 1998), which is currently one of the  
 271 most widely used paradigms in VWM research. In this task, the observer briefly holds a set of  
 272 items in memory and then reports their estimate of a randomly probed target item (Fig. 2A). Set  
 273 size effects manifest as a widening of the estimation error distribution as the number of items is  
 274 increased (Fig. 2B), which suggests a decrease in the amount of resource per item (Fig. 2C).

275 To apply our model to this task, we express the expected local behavioral cost as an  
276 expected value of a local behavioral cost with respect to the error distribution,

277

$$278 \quad \bar{c}_{\text{behavioral},i}(\bar{J}_i; \tau) = \int c_{\text{behavioral},i}(\varepsilon) p(\varepsilon; \bar{J}_i, \tau) d\varepsilon, \quad (12)$$

279

280 where the behavioral cost function  $c_{\text{behavioral},i}(\varepsilon)$  maps an encoding error  $\varepsilon$  to a cost and  $p(\varepsilon; \bar{J}_i, \tau)$   
281 is the predicted distribution of  $\varepsilon$  for an item encoded with resource  $\bar{J}_i$ . We first specify  
282  $p(\varepsilon; \bar{J}_i, \tau)$  and then turn to  $c_{\text{behavioral},i}(\varepsilon)$ . Since the task-relevant feature in delayed-estimation  
283 experiments is usually a circular variable (color or orientation), we make the common assumption  
284 that  $\varepsilon$  follows a Von Mises distribution. We denote this distribution by  $\text{VM}(\varepsilon; J)$ , where  $J$  is one-  
285 to-one related to the distribution's concentration parameter  $\kappa$  (see Supplementary Information).  
286 The distribution of  $\varepsilon$  for a stimulus encoded with resource  $\bar{J}_i$  is found by integrating over  $J$ ,

287

$$288 \quad p(\varepsilon; \bar{J}_i, \tau) = \int \text{VM}(\varepsilon; J) \text{Gamma}(J; \bar{J}_i, \tau) dJ \quad (13)$$

289

290 Finally, we specify the behavioral cost function  $c_{\text{behavioral},i}(\varepsilon)$  in Eq. (12), which maps an  
291 estimation error  $\varepsilon$  to a behavioral cost. As in most psychophysical experiments, human subjects  
292 tend to perform well on delayed-estimation tasks even when the reward is independent of their  
293 performance. This suggests that the behavioral cost function is strongly determined by internally  
294 incentives. A recent paper (Sims 2015) has attempted to measure this mapping and proposed a  
295 two-parameter function. We will test that proposal later, but for the moment we assume a simpler,  
296 one-parameter power-law function,  $c_{\text{behavioral},i}(\varepsilon; \beta) = |\varepsilon|^\beta$ , where power  $\beta$  is a free parameter.

297 To get an intuition for the predictions of this model, we plot the expected behavioral cost,  
298 the expected neural cost, and their sum as a function of  $\bar{J}$  for a specific set of parameters and for  
299 four different values of probing probability  $p_i$  (Fig. 2D). The expected total cost has a unique  
300 minimum in all four cases and the value of  $\bar{J}$  corresponding to this minimum increases with  $p_i$ .  
301 Hence, in this example, the optimal amount of resource assigned to an item is an increasing  
302 function of its probing probability.

303 The probing probabilities in Fig. 2D correspond to the probing probabilities of items at set  
 304 sizes 1, 2, 4, and 8 in a task where each item is equally likely to be probed,  $p_i=1/N$ . When we  
 305 replot the values of  $\bar{J}_{\text{optimal}}$  from Fig. 2D as a function of set size, we observe a set size effect that  
 306 is qualitatively similar to effects observed in empirical data (Fig. 2E; cf. Fig. 2C). Hence, the  
 307 model predicts set size effects in delayed estimation tasks, even though these effects are fully  
 308 mediated by individual-item probing probability. This notion is reminiscent of empirical  
 309 observations. Palmer (1993) reported that “relevant set size” (where irrelevance means  $p_i=0$ ) acts  
 310 virtually identically to actual set size. Emrich et al. (2017) independently varied probing  
 311 probability and set size in their experiment, and found that the former was a better predictor of  
 312 performance than the latter. Based on this, they hypothesized that set size effects are mediated by  
 313 probing probability. These findings are – at least qualitatively – consistent with the predictions of  
 314 our model.

315  
 316  
 317 *Table 1. Overview of experimental datasets. Experiments E5 and E6 differed in the way that*  
 318 *subjects provided their responses (E5: color wheel; E6: scroll).*

| <b>ID</b> | <b>Reference</b>           | <b>Feature</b> | <b>Set size(s)</b> | <b>Probing probability</b> | <b>Number of subjects</b> |
|-----------|----------------------------|----------------|--------------------|----------------------------|---------------------------|
| E1        | (Wilken & Ma 2004)         | Color          | 1, 2, 4, 8         | Equal                      | 15                        |
| E2        | (Zhang & Luck 2008)        | Color          | 1, 2, 3, 6         | Equal                      | 8                         |
| E3        | (Bays et al. 2009)         | Color          | 1, 2, 4, 6         | Equal                      | 12                        |
| E4        | (Van Den Berg et al. 2012) | Orientation    | 1-8                | Equal                      | 6                         |
| E5        | (Van Den Berg et al. 2012) | Color          | 1-8                | Equal                      | 13                        |
| E6        | (Van Den Berg et al. 2012) | Color          | 1-8                | Equal                      | 13                        |
| E7        | (Bays 2014)                | Orientation    | 2,4,8              | Unequal                    | 7                         |
| E8        | (Emrich et al. 2017)       | Color          | 4                  | Unequal                    | 20                        |
| E9        | (Emrich et al. 2017)       | Color          | 6                  | Unequal                    | 20                        |

319  
 320  
 321  
 322

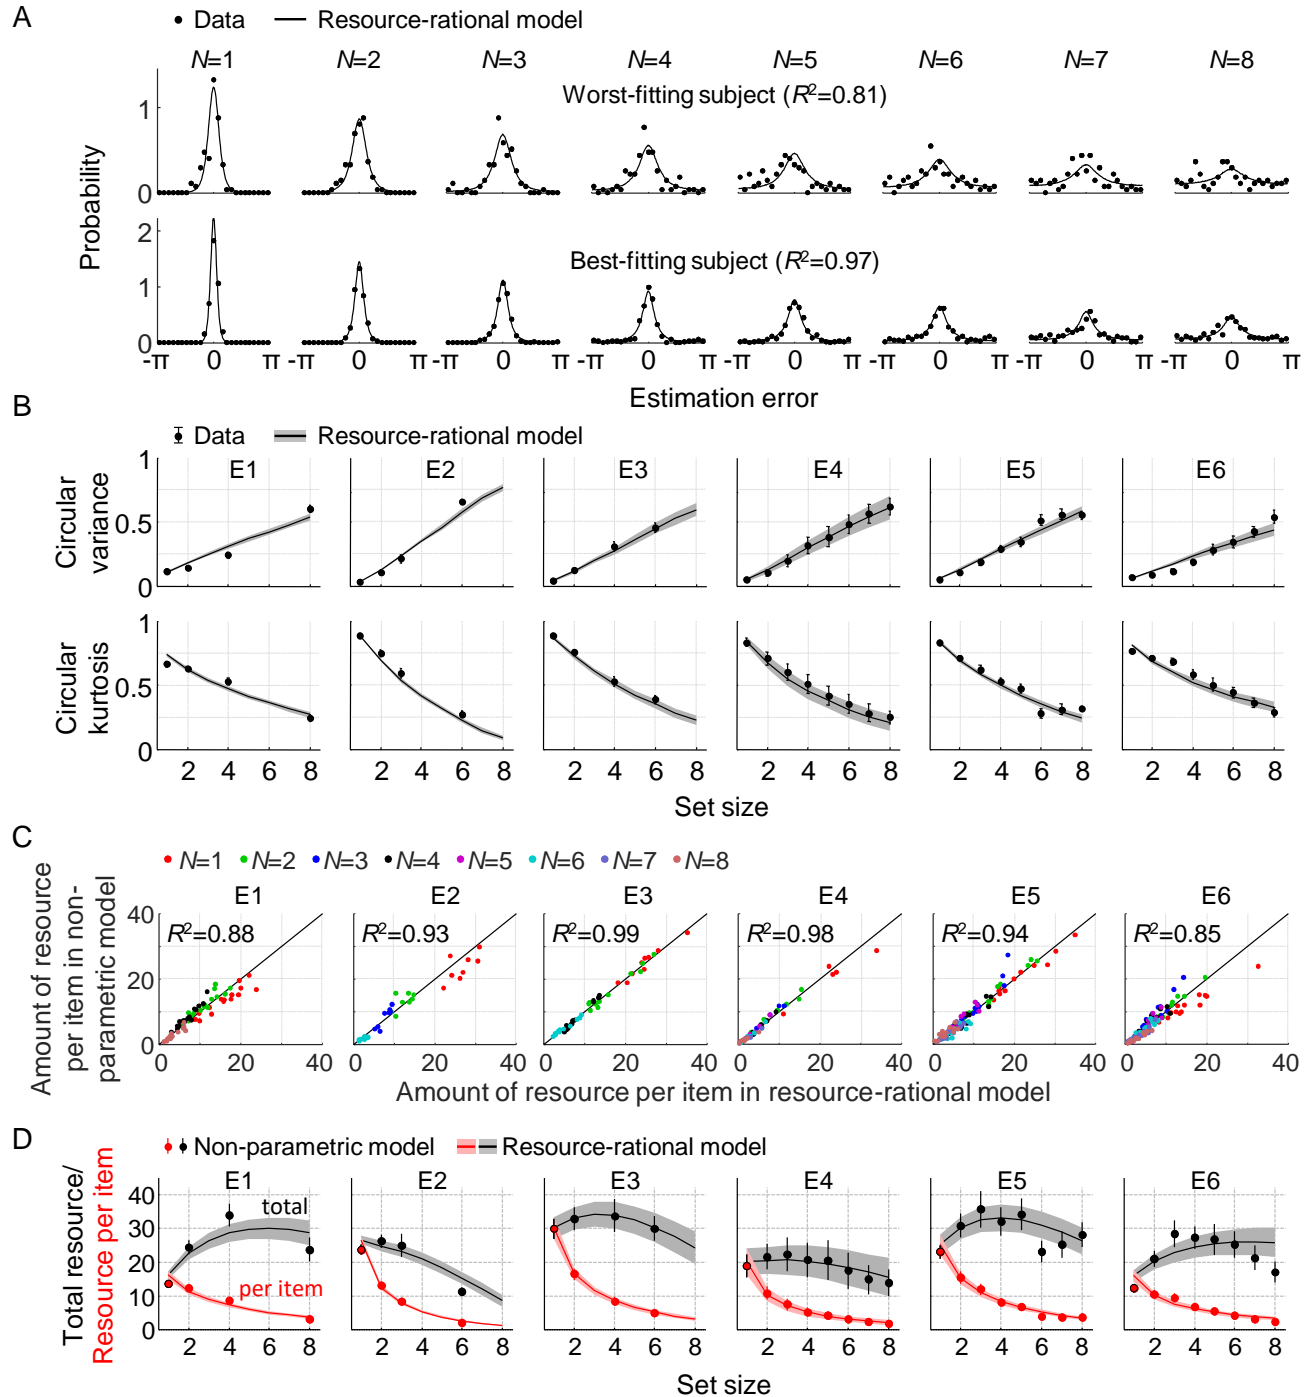

**Figure 3. Model fits to data from six delayed-estimation experiments with equal probing probabilities.** (A) Maximum-likelihood fits to raw data of the worst-fitting and best-fitting subjects. Goodness of fit was measured as  $R^2$ , computed for each subject by concatenating histograms across set sizes. (B) Subject-averaged circular variance and kurtosis of the estimation error, as a function of set size and split by experiment. The maximum-likelihood fits of the model account well for the trends in these statistics. (C) Estimated amounts of resource per item in the resource-rational model scattered against the estimates in the non-parametric model. Each dot represents estimates from a single subject. (D) Estimated amount of resource per item (red) and total resource (black) plotted against set size. Here and in subsequent figures, error bars and shaded areas represent 1 s.e.m. of the mean across subjects.

## 324 **Model fits to data from delayed-estimation experiments with equal probing probabilities**

325 To examine how well the model accounts for set size effects in empirical data, we fit it to data  
326 from six experiments that are part of a previously published benchmark set (E1-E6 in Table 1)\*.  
327 We use a Bayesian optimization method (Acerbi & Ma 2017) to estimate the maximum-  
328 likelihood parameter values, separately for each individual data set (see Supplementary Table S1  
329 for a summary of the estimates). The results show that the model accounts well for the subject-  
330 level error distributions (Fig. 3A) and the two statistics that summarize these distributions (Fig.  
331 3B).

332 We next compare the goodness of fit of the resource-rational model to that of a descriptive  
333 variant in which the amount of resource per item,  $\bar{J}$ , is assumed to be a power-law function of  
334 set size (all other aspects of the model are kept the same). This variant is identical to the VP-A  
335 model in our earlier work (van den Berg et al. 2014). Model comparison based on the Akaike  
336 Information Criterion (AIC) (Akaike 1974) indicates that the data provide similar support for  
337 both models, with a small advantage for the resource-rational model ( $\Delta\text{AIC}=5.27\pm 0.70$ ;  
338 throughout the paper,  $X\pm Y$  indicates mean $\pm$ s.e.m. across subjects). Hence, the resource-rational  
339 model provides a principled explanation of set size effects without sacrificing quality of fit  
340 compared to one of the best available descriptive models of VWM<sup>†</sup>. We find that the resource-  
341 rational model also fits better than a model in which the total amount of resource is fixed and  
342 divided equally across items ( $\Delta\text{AIC}=13.9\pm 1.4$ ).

343 So far, we have assumed that there is random variability in the actual amount of resource  
344 assigned to an item. Next, we test an equal-precision variant of the resource-rational model, by  
345 fixing parameter  $\tau$  to a very small value ( $10^{-3}$ ). Consistent with the results obtained with the  
346 variable-precision model, we find that the rational model has a substantial AIC advantage over a  
347 fixed-resource model ( $\Delta\text{AIC}=43.0\pm 6.8$ ) and is at equal footing with the power-law model  
348 ( $\Delta\text{AIC}=2.0\pm 1.7$  in favor of the power-law model). However, all three equal-precision models  
349 (fixed resource, power law, rational) are outperformed by their variable-precision equivalents by

---

\* The original benchmark set (van den Berg et al. 2014) contains 10 data sets. Three of those were published in papers that were later retracted and another one contains data at only two set sizes. While the model also accounts well for those data sets (Fig. S1 in Supplementary Information), we decided to exclude them from the main analyses.

<sup>†</sup> In previous work (van den Berg et al. 2014) we have shown that the VP-A model outperforms basically any other descriptive VWM model, such as for example the slot-plus-averaging model (Zhang & Luck 2008). Hence, the finding that the resource-rational model is at equal footing with VP-A means that it outperforms most of the previously proposed descriptive models.



350 over 100 AIC points. Therefore, we will only consider variable-precision models in the remainder  
351 of the paper.

352 To get an indication of the absolute goodness of fit of the resource-rational model, we  
353 next examine how much room for improvement there is in the fits. We do this by fitting a non-  
354 parametric model variant in which resource  $\bar{J}$  is a free parameter at each set size, while keeping  
355 all other aspects of the model the same. We find a marginal AIC difference, which indicates that  
356 the fits of the rational model cannot be improved much further without overfitting the data  
357 ( $\Delta\text{AIC}=3.49\pm 0.93$ , in favor of the non-parametric model). An examination of the fitted parameter  
358 values corroborates this finding: the estimated resource values in the non-parametric model  
359 closely match the optimal values in the rational model (Fig. 3C).

360 So far, we have assumed that behavioral cost is a power-law function of the absolute  
361 estimation error,  $c_{\text{behavioral}}(\varepsilon)=|\varepsilon|^\beta$ . To evaluate the necessity of a free parameter in this function,  
362 we also test three parameter-free choices:  $|\varepsilon|$ ,  $\varepsilon^2$ , and  $-\cos(\varepsilon)$ . Model comparison favors the  
363 original model with AIC differences of  $14.0\pm 2.8$ ,  $24.4\pm 4.1$ , and  $19.5\pm 3.5$ , respectively. While  
364 there may be other parameter-free functions that give better fits, we expect that a free parameter  
365 is unavoidable here, as the error-to-cost mapping may differ across experiments (due to  
366 differences in external incentives) and also across subjects within an experiment (due to  
367 differences in intrinsic motivation). Finally, we also test a two-parameter function that was  
368 proposed recently (Eq. (5) in (Sims 2015)). The main difference with our original choice is that  
369 this alternative function allows for saturation effects in the error-to-cost mapping. However, this  
370 extra flexibility does not increase the goodness of fit sufficiently to justify the additional  
371 parameter, as the original model outperforms this variant with an AIC difference of  $5.3\pm 1.8$ .

372 Finally, we use five-fold cross validation to verify the AIC-based results reported in this  
373 section. We find that they are all consistent (Table S2 in Supplementary Information).

374

### 375 **Non-monotonic relation between total resource and set size**

376 One quantitative feature that sets the resource-rational theory apart from previous theories is its  
377 predicted relation between set size and the total amount of invested resource,  $\bar{J}_{\text{total}} = \sum_{i=1}^N \bar{J}_i$ .  
378 This quantity is – by definition – constant in fixed-resource models, and in power-law models it  
379 varies monotonically with set size. By contrast, we find that in the fits to several of the  
380 experiments,  $\bar{J}_{\text{total}}$  varies *non-monotonically* with set size (Fig. 3D, gray curves). To examine



381 whether there is evidence for non-monotonic trends in the subject data, we next compute an  
382 “empirical” estimate  $\hat{J}_{\text{total}} = \sum_{i=1}^N \hat{J}_i$ , where  $\hat{J}_i$  are the best-fitting resource estimates in the non-  
383 parametric model. We find that these estimates show evidence of similar non-monotonic relations  
384 in some of the experiments (Fig. 3D, black circles). To quantify this evidence, we perform  
385 Bayesian paired t-tests in which we compare the estimates of  $\hat{J}_{\text{total}}$  at set size 3 with the estimates  
386 at set sizes 1 and 6 in the experiments that included these three set sizes (E2 and E4-E6). These  
387 tests reveal strong evidence that the total amount of resource is higher at set size 3 than at set  
388 sizes 1 ( $\text{BF}_{+0}=1.05 \cdot 10^7$ ) and 6 ( $\text{BF}_{+0}=4.02 \cdot 10^2$ ). We next compute for each subject the set size at  
389 which  $\hat{J}_{\text{total}}$  is largest, which we denote by  $N_{\text{peak}}$ , and find a subject-averaged value of  $3.52 \pm 0.18$ .  
390 Altogether, these findings suggest that the total amount of resource that subjects spend on item  
391 encoding varies non-monotonically with set size, which is consistent with predictions from the  
392 resource-rational model, but not with any of the previously proposed models. To the best of our  
393 knowledge, evidence for a possible non-monotonicity in the relation between set size and total  
394 encoding resource has not been reported before.

395

### 396 **Predicted effects of probing probability**

397 As we noted before, the model predictions do not explicitly depend on set size,  $N$ . Yet, we found  
398 that the model accounts well for set size effects in the experiments that we considered so far (E1-  
399 E6). The resolution of this paradox is that in all those experiments,  $N$  was directly coupled with  
400 probing probability  $p_i$ , through  $p_i=1/N$ . This coupling makes it impossible to determine whether  
401 changes in subjects’ encoding precision are due to changes in  $N$  or due to changes in  $p_i$ .  
402 Therefore, we will next consider experiments in which individual probing probabilities and set  
403 size were varied independently of each other (E7-E9 in Table 1). According to our model, the  
404 effects of  $N$  that we found in E1-E6 were really effects of  $p_i$ . Therefore, we should be able to  
405 make predictions about effects of  $p_i$  in E7-E9 by recasting the effects of  $N$  in E1-E6 as effects of  
406  $p_i=1/N$ . Given that the amount of resource per item in E1-E6 decreases with  $N$ , a first prediction  
407 is that it should increase as a function of  $p_i$  in E7-E9. A second and particularly interesting  
408 prediction is that the estimated total amount of invested resource should vary non-monotonically  
409 with  $p_i$  and peak at a value  $p_{\text{peak}}$  that is close to  $1/N_{\text{peak}}$  found in E1-E6 (see previous section).  
410 Based on the values of  $N_{\text{peak}}$  in experiments E1-E6, we find a prediction  $p_{\text{peak}}=0.358 \pm 0.026$ .

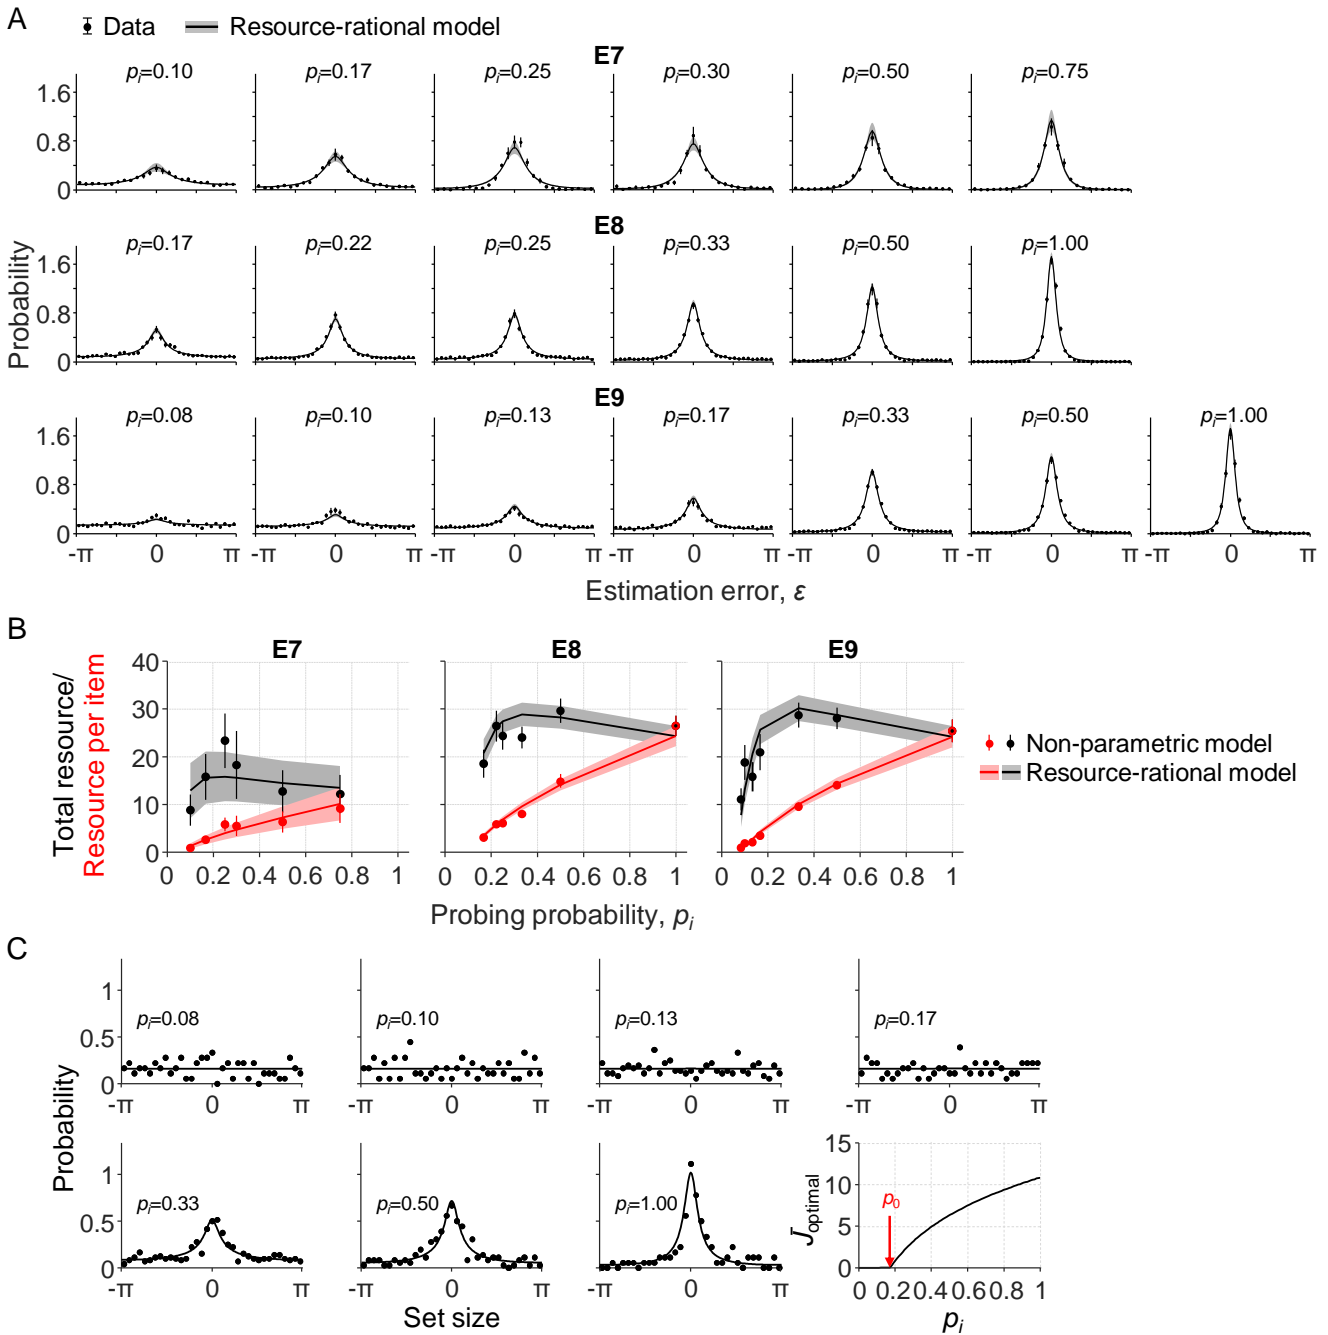

**Figure 4. Model fits to data from three delayed-estimation experiments with unequal probing probabilities.** (A) Fits of the resource-rational model (curves) to the data (black circles) of experiments E7-E9. (B) Estimated amount of resource per item as a function of probing probability (red) and the corresponding estimated total amount of resource that the subject would spend on encoding a display filled with items with the equal probing probabilities (black). (C) Error histograms and a plot of  $J_{\text{optimal}}$  as a function of  $p_i$  for one of the subjects with an estimated value of  $p_0$  larger than the smallest probing probability (subject S4 in E9;  $p_0=0.18$ ). The error histograms for items with the four lowest probing probabilities appear to be uniform for this subject, which is indicative of guessing ( $p>0.23$  in Kolmogorov-Smirnov tests for uniformity on these four distributions).

## 412 **Model fits to data from delayed-estimation experiments with unequal probing probabilities**

413 To test the predictions presented in the previous section and, more generally, to evaluate how  
414 well our model accounts for effects of  $p_i$  on encoding precision, we fit it to data from three  
415 experiments in which probing probability was varied independently of set size (E7-E9 in Table  
416 1).

417 In the first of these experiments (E7), seven subjects performed a delayed-estimation task  
418 at set sizes 2, 4, and 8. On each trial, one of the items – indicated with a cue – was three times  
419 more likely to be probed than any of the other items. Hence, the probing probabilities for the cued  
420 and uncued items were  $3/4$  and  $1/4$  at  $N=2$ , respectively,  $1/2$  and  $1/6$  at  $N=4$ , and  $3/10$  and  $1/10$  at  
421  $N=8$ . The subject data show a clear effect of  $p_i$ : the higher the probing probability of an item, the  
422 more precise the subject responses (Fig. 4A, top row, black circles). We find that the resource-  
423 rational model, Eq. (11), accounts well for this effect (Fig. 4A, top row, curves) and does so by  
424 increasing the amount of resource as a function of probing probability  $p_i$  (Fig. 4B, left panel, red  
425 curves).

426 In the other two experiments (E8 and E9), the number of cued items and cue validity were  
427 varied between conditions, while set size was kept constant at 4 or 6. For example, in one of the  
428 conditions of E8, three of the four items were cued with 100% validity, such that  $p_i$  was  $1/3$  for  
429 each cued item and 0 for the uncued item; in another condition of the same experiment, two of the  
430 four items were cued with 66.7% validity, meaning that  $p_i$  was  $1/3$  for each cued item and  $1/6$  for  
431 each uncued item. The unique values of  $p_i$  across all conditions were  $\{0, 1/6, 2/9, 1/4, 1/3, 1/2, 1\}$   
432 in E8 and  $\{0, 1/12, 1/10, 2/15, 1/6, 1/3, 1/2, \text{ and } 1\}$  in E9. As in E7, responses get more precise  
433 with increasing  $p_i$  and the model accounts well for this (Fig. 4A), again by increasing the amount  
434 of resource assigned to an item with  $p_i$  (Fig. 4B).

435 We next examine how our model compares to the models proposed in the papers that  
436 originally published these three datasets. In contrast to our model, both Bays (2014) and Emrich  
437 et al. (2017) proposed that the total amount of invested resource is fixed. However, while Bays  
438 proposed that the distribution of this resource is in accordance with minimization of a behavioral  
439 cost function (as in our model), Emrich et al. postulated that the resource is distributed in  
440 proportion to each item's probing probability. Hence, while our model optimizes both the amount  
441 of invested resource and its distribution, Bays' model only optimizes the distribution, and Emrich  
442 et al.'s model does not explicitly optimize anything. To examine how the three proposals

443 compare in terms of how well they account for the data, we fit two variants of our model that  
444 encapsulate the main assumptions of these two earlier proposals. In the first variant, we compute  
445  $\bar{\mathbf{J}}_{\text{optimal}}$  as  $\underset{\bar{\mathbf{J}}}{\operatorname{argmin}} \left[ \sum_{i=1}^N p_i \bar{c}_{\text{behavioral}}(\bar{J}_i; \beta, \tau) \right]$  under the constraint  $\sum_{i=1}^N \bar{J}_i = \bar{J}_{\text{total}}$ , which is consistent  
446 with Bays's proposal. Hence, in this variant, the neural cost function is removed and parameter  $\lambda$   
447 is replaced by a parameter  $\bar{J}_{\text{total}}$  – otherwise, all aspects of the model are the same as in our main  
448 model. In the variant that we use to test Emrich et al.'s proposal, we compute  $\bar{J}_i$  for each item as  
449  $p_i \bar{J}_{\text{total}}$ , where  $p_i$  is the probing probability and  $\bar{J}_{\text{total}}$  is again a free parameter that represents the  
450 total amount of resource. Comparing the models using the data from all 47 subjects of E7-E9, we  
451 find a substantial advantage of our model over the proposal by Emrich et al., with an AIC  
452 difference of  $18.0 \pm 3.9$ . However, our model cannot reliably be distinguished from the proposal  
453 by Bays: both models are preferred in about half of the subjects (our model: 27; Bays: 20) and the  
454 subject-averaged AIC difference is negligible ( $1.8 \pm 2.5$  in favor of our model). Hence, the model  
455 comparison suggests quite convincingly that subjects distribute their resource near-optimally  
456 across items with unequal probing probabilities, but it is inconclusive regarding the question  
457 whether the total amount of invested resource is fixed or optimized.

458 As an alternative way to address the question of whether the total amount of resource is  
459 fixed, we again fit a non-parametric model to obtain “empirical” estimates of the total amount of  
460 invested resource. To this end, we define  $\hat{J}_{\text{total}} = \hat{J}_i / p_i$ , where  $\hat{J}_i$  are the best-fitting values in a  
461 non-parametric model, such that  $\hat{J}_{\text{total}}$  represents the estimated total amount of resource that a  
462 subject would invest to encode a display filled with items that all have probing probability  $p_i$ . We  
463 find that these estimates show signs of a non-monotonicity as a function of  $p_i$  (Fig. 4B, black  
464 points), which are captured reasonably well by the resource-rational model (Fig. 4B, black  
465 curves). Averaged across all subjects in E7-E9, the value of  $p_i$  at which  $\hat{J}_{\text{total}}$  is largest is  
466  $0.384 \pm 0.037$ , which is close to the predicted value of  $0.358 \pm 0.026$  (see previous section). Indeed,  
467 a Bayesian independent-samples t-test supports the null hypothesis that there is no difference  
468 ( $\text{BF}_{01}=4.27$ ). Hence, while the model comparison results in the previous paragraph were  
469 inconclusive regarding the question whether the total amount of invested resource is fixed or

470 optimized, the present analysis provides evidence against fixed-resource models and confirms a  
471 prediction made by our own model.

472 In summary, the results in this section show that effects of probing probability in E7-E9  
473 are well accounted for by the same model as we used to explain effects of set size in E1-E6.  
474 Regardless of whether total resource is fixed or optimized, this finding provides further support  
475 for the suggestion that set size effects are mediated by probing probability (Emrich et al. 2017)  
476 or, more generally, by item relevance (Palmer et al. 1993).

### 477 **Is it ever optimal to not encode an item?**

478 There is an ongoing debate about the question whether a task-relevant item is sometimes  
479 completely left out of working memory (Adam et al. 2017; Luck & Vogel 2013; Ma et al. 2014;  
480 Rouder et al. 2008). Specifically, slot models predict that this happens when set size exceeds the  
481 number of slots (Zhang & Luck 2008). In resource models, the possibility of complete forgetting  
482 has so far been an added ingredient separate from the core of the model (van den Berg et al.  
483 2014). Our normative theory allows for a reinterpretation of the question: are there situations in  
484 which it is optimal to assign zero resource to the encoding of an item? We already established  
485 that this could happen in delayed-estimation tasks: whenever the probing probability is lower than

486 a threshold value  $p_0 = \frac{\lambda}{|\bar{c}_{\text{behavioral}}'(0)|}$ , the optimal amount of resource to invest on encoding the

487 item is zero (see Theory). But what values does  $p_0$  take in practice? Considering the expected  
488 behavioral cost function of a fixed-precision model (a variable-precision model with  $\tau \downarrow 0$ ), we  
489 can prove that  $p_0=0$ , i.e. it is never optimal to not invest any resource (Supplementary  
490 Information). For the expected behavioral cost function of the general variable-precision model,  
491 however, simulations indicate that  $p_0$  can be greater than 0 (we were not able to derive this result  
492 analytically). We next examine whether this ever happens under parameter values that are  
493 representative for human subjects. Using the maximum-likelihood parameters obtained from the  
494 data in E7-E9, we estimate that  $p_0$  (expressed as a percentage) equals  $8.86 \pm 0.54\%$ . Moreover,  
495 we find that for 8 of the 47 subjects,  $p_0$  is larger than the lowest probing probability in the  
496 experiment, which suggests that these subjects sometimes entirely ignored one or more of the  
497 items. For these subjects, the error distributions on items with  $p_i < p_0$  look uniform (see Fig. 4C for

498 an example) and Kolmogorov-Smirnov tests for uniformity did not reject the null hypothesis in  
499 any of these cases ( $p > 0.05$  in all tests).

500 These results suggest that there might be a principled reason for why people sometimes  
501 leave task-relevant items out of visual working memory in delayed-estimation experiments.  
502 However, our model cannot explain all previously reported evidence for this. In particular, when  
503 probing probabilities are equal for all items, the model makes an “all or none” prediction: all  
504 items are encoded when  $p_i > p_0$  and none otherwise. Hence, it cannot explain why subjects in tasks  
505 with equal probing probabilities sometimes seem to encode a subset of task-relevant items. For  
506 example, a recent study reported that in a whole-report delayed-estimation experiment ( $p_i = 1$  for  
507 all items), subjects encoded about half of the 6 presented items on each trial (Adam et al. 2017).  
508 Unless additional assumptions are made, our model cannot account for this finding.

509

### 510 **Predictions for a global task: whole-display change detection**

511 The results so far show that the resource-rational model accounts well for data in a variety of  
512 delayed-estimation experiments. To examine how its predictions generalize to other tasks, we  
513 next consider a change detection task, which is another widely used paradigm in research on  
514 VWM. In this task, the observer is sequentially presented with two sets of items and reports if  
515 any one of them changed (Fig. 5A). In the variant that we consider here, a change is present on  
516 exactly half of the trials and is equally likely to occur in any of the items. We construct a model  
517 for this task by combining Eqs. (3), (4), and (8) with an expected behavioral cost function based  
518 on the Bayesian decision rule for this task (see Supplementary Information), which yields

$$519 \quad \bar{\mathbf{J}}_{\text{optimal}} = \underset{\bar{\mathbf{J}}}{\operatorname{argmin}} \left[ p(\text{error} | \bar{\mathbf{J}}) + \lambda \sum_{i=1}^N \bar{J}_i \right], \quad (14)$$

520

521 where  $p(\text{error} | \bar{\mathbf{J}})$  is the expected behavioral cost function, which in this case specifies the  
522 probability of an error response when a set of items is encoded with resource  $\bar{\mathbf{J}}$ .

523 In contrast to local tasks, the total expected cost in global tasks cannot be written as a sum  
524 of local expected costs, because the expected behavioral cost – such as  $p(\text{error} | \bar{\mathbf{J}})$  in Eq. (14) –  
525 can only be computed globally, not per item. Consequently, the elements of  $\bar{\mathbf{J}}_{\text{optimal}}$  in global  
526 tasks cannot be computed separately for each item. This makes resource optimization

527 computationally much more demanding, because it requires solving an  $N$ -dimensional  
 528 minimization problem instead of  $N$  one-dimensional problems.  
 529

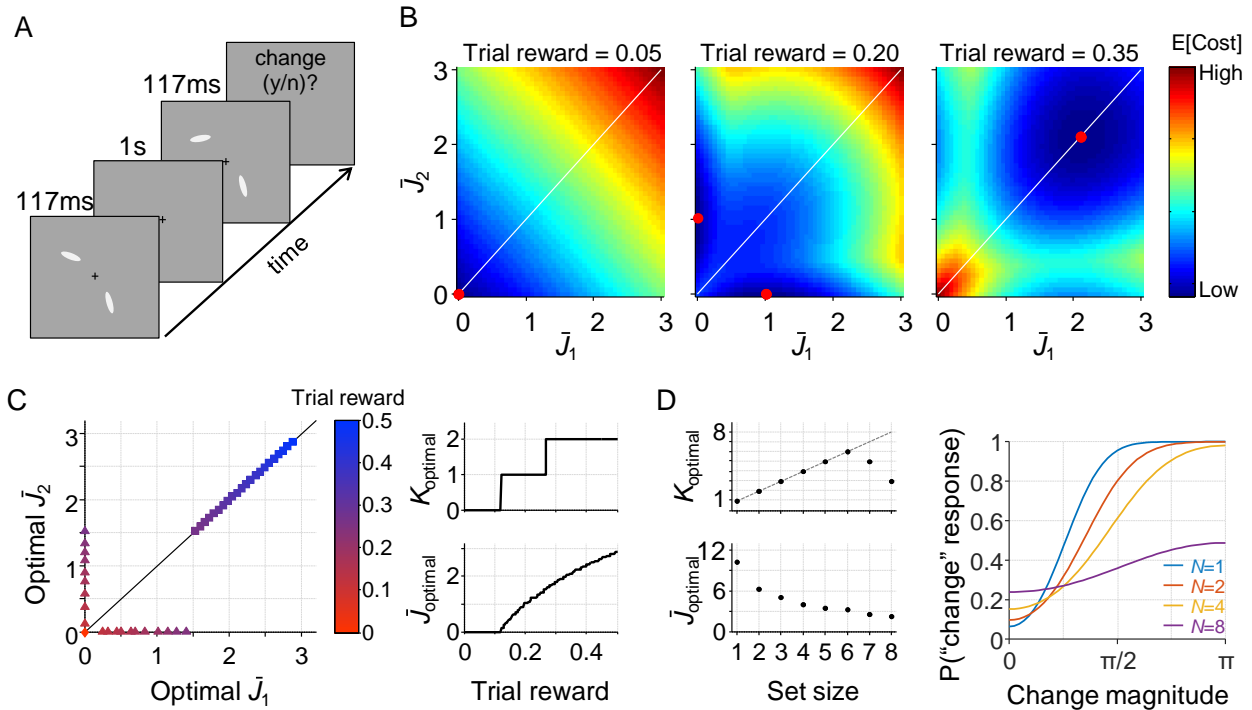

**Figure 5. A resource-rational model for change-detection tasks.** (A) Example of a trial in a change detection task with a set size of 2. The subject is sequentially presented with two sets of stimuli and reports whether there was a change at any of the item locations. (B) Simulated expected total cost in the resource-rational cost function applied to a task with a set size of 2 and a reward of 0.05 (left), 0.20 (center), or 0.35 (right) units per correct trial. The red dot indicates the location of minimum cost, i.e., the resource-optimal combination of  $\bar{J}_1$  and  $\bar{J}_2$  (note that the expected cost function in the central panel has a minimum at two distinct locations). When reward is low (left), the optimal strategy is to encode neither of the two stimuli. When reward is high (right), the optimal strategy is to encode both stimuli with equal amounts of resource. For intermediate reward (center), the optimal strategy is to encode one of the two items, but not the other one. (C) Model predictions as a function of trial rewards at  $N=2$ . Left: The amount of resource assigned to the two items for a range of reward values. Right: the corresponding optimal number of encoded items (top) and optimal amount of resource per encoded item (bottom) as a function of reward. (D) Model predictions as a function of set size (trial reward = 1.5). The model predicts set size effects in both the number of encoded items (left, top) and the amount of resource with which these items are encoded (left, bottom). Moreover, the model produces response data (right) that are qualitatively similar to human data (e.g., Keshvari et al. 2013). The parameter values used in all simulations were  $\lambda=0.01$  and  $\tau \downarrow 0$ .

530  
 531  
 532 We next perform a simulation at  $N=2$  (which is still tractable) to get an intuition of the  
 533 predictions that follow from Eq. (14). For practical convenience, we assume in this simulation  
 534 that there is no variability in precision,  $\tau \downarrow 0$ , such that  $\lambda$  is the only model parameter. The results



535 (Fig. 5B) show that the cost-minimizing strategy is to encode neither of the items when the  
536 amount of reward per correct trial is very low (left panel) and encode them both when reward is  
537 high (right panel). However, interestingly, there is also an intermediate regime in which the  
538 optimal strategy is to encode one of the two items, but not the other one (Fig. 5B, central panel).  
539 Hence, just as in the delayed-estimation task, there are conditions in which it is optimal to encode  
540 only a subset of items. An important difference, however, is that in the delayed-estimation task  
541 this only happens when items have unequal probing probabilities, while in this change detection  
542 task it even happens when all items are equally likely to change.

543 Simulations at larger set sizes quickly become computationally intractable, because of the  
544 reason mentioned above. However, the results at  $N=2$  suggest that if two items are encoded, the  
545 optimal solution is to encode them with the same amount of resource (Fig. 5C). Therefore, we  
546 conjecture that all non-zero values in  $\bar{\mathbf{J}}_{\text{optimal}}$  are identical, which would mean that the entire  
547 vector can be summarized by two values: the number of encoded items, which we denote by  
548  $K_{\text{optimal}}$ , and the amount of resource assigned to each encoded item, which we denote by  $\bar{J}_{\text{optimal}}$ .  
549 Using this conjecture (which we have not yet been able to prove), we are able to efficiently  
550 compute predictions at an arbitrary set size. Simulation results show that the model then predicts  
551 that both  $K_{\text{optimal}}$  and  $\bar{J}_{\text{optimal}}$  depend on set size (Fig 4D, left) and produces response data that are  
552 qualitatively similar to human data (Fig. 5D, right).

553

## 554 **DISCUSSION**

555

### 556 **Summary**

557 Descriptive models of visual working memory (VWM) have evolved to a point where there is  
558 little room for improvement in how well they account for experimental data. Nevertheless, the  
559 basic finding that VWM precision depends on set size still lacks a principled explanation. Here,  
560 we examined a normative proposal in which expected task performance is traded off against the  
561 cost of spending neural resource on encoding. We used this principle to construct a resource-  
562 rational model for “local” VWM tasks and found that set size effects in this model are fully  
563 mediated by the probing probabilities of the individual items; this is consistent with suggestions  
564 from earlier empirical work (Emrich et al. 2017; Palmer et al. 1993). From the perspective of our



565 model, the interpretation is that as more items are added to a task, the relevance of each  
566 individual item decreases, which makes it less cost-efficient to spend resource on its encoding.  
567 We also found that in this model it is sometimes optimal to encode only a subset of task-relevant  
568 items, which implies that resource rationality could serve as a principled bridge between resource  
569 and slot-based models of visual working memory. We tested the model on data from nine  
570 previous delayed-estimation experiments and found that it accounts well for effects of both set  
571 size and probing probability, despite having relatively few parameters. Moreover, it accounts for  
572 a non-monotonicity that appears to exist between set size and the total amount of resource that  
573 subjects invest in item encoding. The broader implication of our findings is that VWM limitations  
574 – and cognitive limitations in general – may be driven by a mechanism that minimizes a cost,  
575 instead of by a fixed constraint on available encoding resource.

## 576 577 **Limitations**

578 Our theory makes a number of assumptions that need further investigation. First, we have  
579 assumed that the expected behavioral cost decreases indefinitely with the amount of invested  
580 resource, such that in the limit of infinite resource there is no encoding error and no behavioral  
581 cost. However, encoding precision in VWM is fundamentally limited by the precision of the  
582 sensory input, which is itself limited by irreducible sources of neural noise – such as Johnson  
583 noise and Poisson shot noise (Faisal et al. 2008; Smith 2015) – and suboptimalities in early  
584 sensory processing (Beck et al. 2012). One way to incorporate this limitation is by assuming that  
585 there is a resource value  $\bar{J}_{\text{input}}$  beyond which the expected behavioral cost no longer decreases as  
586 a function of  $\bar{J}$ . In this variant,  $\bar{J}_{\text{input}}$  represents the quality of the input and  $\bar{J}_{\text{optimal}}$  will never  
587 exceed this value, because any additional resource would increase the expected neural cost  
588 without decreasing the expected behavioral cost.

589 Second, our theory assumes that there is no upper limit on the total amount of resource  
590 available for encoding: cost is the only factor that matters. However, since the brain is a finite  
591 entity, the total amount of resource must obviously have an upper limit. This constraint can be  
592 incorporated by optimizing  $\mathbf{J}_{\text{optimal}}$  under the constraint  $\sum_{i=1}^N \bar{J}_{\text{optimal},i} \leq \bar{J}_{\text{max}}$ , where  $\bar{J}_{\text{max}}$   
593 represents the maximum amount of resource that can be invested. While an upper limit certainly  
594 exists, it may be much higher than the average amount of resource needed to encode information

595 with the same fidelity as the sensory input. If that is the case, then  $\bar{J}_{\text{input}}$  would be the  
596 constraining factor and  $\bar{J}_{\text{max}}$  would have no effect.

597 Third, our theory assumes that there is no lower limit on the amount of resource available  
598 for encoding. However, there is evidence that task-irrelevant stimuli are sometimes automatically  
599 encoded (Yi et al. 2004; Shin & Ma 2016), perhaps because in natural environments few stimuli  
600 are ever completely irrelevant. This would mean that there is a lower limit to the amount of  
601 resource spent on encoding. In contradiction to the predictions of our model, such a lower limit  
602 would prevent subjects from sometimes encoding nothing at all. For local tasks, such a lower  
603 limit can be incorporated by assuming that probing probability  $p_i$  is never zero.

604 We have fitted our model only to data from delayed-estimation experiments. However, it  
605 applies without modification to other local tasks, such as single-probe change detection (Luck &  
606 Vogel 1997; Todd & Marois 2004) and single-probe change discrimination (Klyszejko et al.  
607 2014). Further work is needed to examine how well the model accounts for empirical data of such  
608 tasks. Moreover, it should be further examine how the theory generalizes to global tasks. One  
609 such task could be whole-report change detection; we presented simulation results for this task  
610 but the theory remains to be further worked out and fitted to the data.

611 A final limitation is that our theory assumes that items are uniformly distributed and  
612 uncorrelated. Although this is correct for most experimental settings, items in more naturalistic  
613 settings are often correlated and can take non-uniform distributions. In such environments, the  
614 expected total cost can probably be further minimized by taking into account statistical  
615 regularities (Orhan et al. 2014). Moreover, recent work has suggested that even when items are  
616 uncorrelated and uniformly distributed, the expected estimation error can sometimes be reduced  
617 by using a “chunking” strategy, i.e., encoding similar items as one (Nassar et al. 2018). However,  
618 since Nassar et al. assumed a fixed total resource and did not take neural encoding cost into  
619 account in their optimization, it remains to be seen whether chunking is also optimal in the kind  
620 of model that we proposed. We speculate that this is likely to be the case, because encoding  
621 multiple items as one will reduce the expected neural cost (fewer items to encode), while the  
622 increase in expected behavioral cost will be negligible if the items are very similar. Hence, it  
623 seems worthwhile to examine models that combine resource rationality with chunking.

624  
625

## 626 **Variability in resource assignment**

627 Throughout the paper, we have assumed that there is variability in resource assignment. Part of  
628 this variability is possibly due to stochastic factors, but part of it may also be systematic – for  
629 example, particular colors and orientations may be encoded with higher precision than others  
630 (Bae et al. 2014; Girshick et al. 2011). Whereas the systematic component could have a rational  
631 basis (e.g., higher precision for colors and orientations that occur more frequently in natural  
632 scenes (Ganguli & Simoncelli 2010; Wei & Stocker 2015)), this is unlikely to be true for the  
633 random component. Indeed, when we jointly optimize  $\bar{J}$  and  $\tau$  in Eq. (11), we find estimates of  $\tau$   
634 that consistently approach 0, meaning that any variability in encoding precision is suboptimal  
635 under our proposed cost function. One way to reconcile this apparent suboptimality with the  
636 otherwise normative theory is to postulate that maintaining exactly equal resource assignment  
637 across cortical regions may itself be a costly process; under such a cost, it could be optimal to  
638 allow for some variability in resource assignment. Another possibility is that there are  
639 unavoidable imperfections in mental inference (Drugowitsch et al. 2016) that make it impossible  
640 to compute  $\bar{J}_{\text{optimal}}$  without error, such that the outcome of the computation will vary from trial to  
641 trial even when the stimuli are identical.

642

## 643 **Experimental predictions of incentive manipulations**

644 In the present study, we have focused on effects of set size and probing probability on encoding  
645 precision. However, our theory also makes predictions about effects of incentive manipulations  
646 on encoding precision, because such manipulations affect the expected behavioral cost function.

647 Incentives can be experimentally manipulated in a variety of ways. One method that was  
648 used in at least two previously published delayed-estimation experiments is to make the feedback  
649 binary (“correct”, “error”) and vary the value of the maximum error allowed to receive positive  
650 feedback (Zhang & Luck 2011; Nassar et al. 2018). In both studies, subjects in a “low precision”  
651 condition received positive feedback whenever their estimation error was smaller than a threshold  
652 value of  $\pi/3$ . Subjects in the “high precision” condition, however, received positive feedback only  
653 when the error was smaller than  $\pi/12$  (Zhang & Luck 2011) or  $\pi/8$  (Nassar et al. 2018). In our  
654 model, this manipulation can be implemented as a behavioral cost function  $c_{\text{behavioral},i}(\varepsilon)$  that maps  
655 values of  $|\varepsilon|$  smaller than the feedback threshold ( $\pi/3$ ,  $\pi/8$ ,  $\pi/12$ ) to 0 and larger values to 1.  
656 Neither of the two studies found evidence for a difference in encoding precision between the low-

657 and high-precision conditions. At first, this may seem to be at odds with the predictions of our  
658 model, as one may expect that it should assign more resource to items in the high-precision  
659 condition. However, simulation results show that the model predictions are not straightforward  
660 and that it can account for the absence of an effect (Fig. S4 in Supplementary Information). In  
661 particular, the simulation results suggest that the experimental manipulations in the studies by  
662 Zhang & Luck and Nassar et al. may not have been strong enough to measure an effect. Indeed,  
663 another study has criticized the study by Zhang & Luck on exactly this point and did find an  
664 effect when using an experimental design with stronger incentives (Fougny et al. 2016).

665 Another method to manipulate incentives is to vary the amount of potential reward across  
666 items within a display. For example, Klyszejko and colleagues performed a local change  
667 discrimination experiment in which the monetary reward for a correct response depended on  
668 which item was probed (Klyszejko et al. 2014). They found a positive relation between the  
669 amount of reward associated with an item and response accuracy, which indicates that subjects  
670 spent more resource on encoding items with larger potential reward. This incentive manipulation  
671 can be implemented by multiplying the behavioral cost function with an item-dependent factor  $u_i$ ,  
672 which modifies Eq. (11) to  $\bar{J}_{\text{optimal},i}(r_i; \lambda, \tau) = \underset{\bar{J}}{\operatorname{argmin}} \left( u_i p_i \bar{c}_{\text{behavioral}}(\bar{J}; \tau) + \lambda \bar{J} \right)$ . The coefficients  $u_i$   
673 and  $p_i$  can be combined into a single “item relevance” coefficient  $r_i = u_i p_i$ , and all theoretical  
674 results and predictions that we derived for  $p_i$  now apply to  $r_i$ .

675 A difference between the two discussed methods is that the former varied incentives  
676 within a trial and the latter across trials. However, both methods can be applied in both ways. A  
677 within-trial variant of the experiments by Zhang & Luck (2011) and Nassar et al. (2018) would be  
678 a  $N=2$  task in which one of the items always has a low positive feedback threshold and the other a  
679 high one. Similarly, a between-trial variant of the experiment by Klyszejko et al. (2014) would be  
680 to scale the behavioral cost function of items with a factor that varies across trials or blocks, but is  
681 constant within a trial. Our model can be used to derive predictions for these task variants, which  
682 to our knowledge have not been reported on yet in the published literature.

683

## 684 **Neural mechanisms and timescale of optimization**

685 Our results raise the question what neural mechanism could implement the optimal allocation  
686 policy that forms the core of our theory. Some form of divisive normalization (Bays 2014;  
687 Carandini & Heeger 2012) would be a likely candidate, which is already a key operation in neural

688 models of attention (Reynolds & Heeger 2009) and visual working memory (Bays 2014; Wei et  
689 al. 2012). The essence of this mechanism is that it lowers the gain when set size is larger, without  
690 requiring explicit knowledge of the set size prior to the presentation of the stimuli. Consistent  
691 with the predictions of this theory, empirical work has found that the neural activity associated  
692 with the encoding of an item decreases with set size, as observed in for example the lateral  
693 intraparietal cortex (Churchland et al. 2008; Balan et al. 2008) and superior colliculus (Basso &  
694 Wurtz 1998). Moreover, the work by Bays (2014) has shown that a modified version of divisive  
695 normalization can account for the near-optimal distribution of resources across items with  
696 unequal probing probabilities. Since set size effects in our model are mediated by probing  
697 probability, its predicted set size effects can probably be accounted for by a similar mechanism.

698 Another question concerns the timescale at which the optimization takes place. In all  
699 experimental data that we considered here, the only factors that changed from trial to trial were  
700 set size (E1-E7) and probing probability (E7-E9). When we fitted the model, we assumed that the  
701 expected total cost in these experiments was minimized on a trial-by-trial basis: whenever set size  
702 or probing probability changed from one trial to the next, the computation of  $\mathbf{J}_{\text{optimal}}$  followed this  
703 change. This assumption accounted well for the data and, as discussed above, previous work has  
704 shown that divisive normalization can accommodate trial-by-trial changes in set size and probing  
705 probability. However, can the same mechanism also accommodate changes in the optimal  
706 resource policy changes driven by other factors, such as the behavioral cost function,  $c_{\text{behavioral}}(\epsilon)$ ?  
707 From a computational standpoint, divisive normalization is a mapping from an input vector of  
708 neural activities to an output vector, and the shape of this mapping depends on the parameters of  
709 the mechanism (such as gain, weighting factors, and a power on the input). Since the mapping is  
710 quite flexible, we expect that it can accommodate a near-optimal allocation policy for most  
711 experimental conditions. However, top-down control and some form of learning (e.g.,  
712 reinforcement learning) are likely required to adjust the parameters of the normalization  
713 mechanism, which would prohibit instantaneous optimality after a change in the experimental  
714 conditions.

715

## 716 **Neural prediction**

717 The total amount of resource that subjects spend on item encoding may vary non-monotonically  
718 with set size in our model. At the neural level, this translates to a prediction of a non-monotonic

719 relation between population-level spiking activity and set size. We are not aware of any studies  
 720 that have specifically addressed this prediction, but it can be tested using neuroimaging  
 721 experiments similar to previously conducted experiments. For example, Balan et al. used single-  
 722 neuron recording to estimate neural activity per item for set sizes 2, 4, and 6 in a visual search  
 723 task (Balan et al. 2008). To test for the existence of the predicted non-monotonicity, the same  
 724 recoding techniques can be used in a VWM task with a more fine-grained range of set sizes. Even  
 725 though it is practically impossible to directly measure population-level activity, reasonable  
 726 estimates may be obtained by multiplying single-neuron recordings with set size (under the  
 727 assumption that an increase in resource translate to an increase in firing rate and not in an  
 728 increase of neurons used to encode an item). A similar method can also assess the relation  
 729 between an item’s probing probability and the spiking activity related to its neural encoding.

730 *Table 2. Examples of resource-rationality concepts in neuroscience, psychology, and economics.*

| <b>Study</b>                                          | <b>Optimized quantity</b>          | <b>Performance term</b>                 | <b>Resource cost/constraint</b> |
|-------------------------------------------------------|------------------------------------|-----------------------------------------|---------------------------------|
| <b>Efficient coding in neural populations</b>         |                                    |                                         |                                 |
| Ganguli & Simoncelli                                  | Tuning curve spacing and width     | Fisher information or discriminability  | Neural activity (constraint)    |
| Olshausen & Field                                     | Receptive field specificity        | Information                             | Sparsity                        |
| <b>Capacity “limitations” in attention and memory</b> |                                    |                                         |                                 |
| Chris R. Sims                                         | Information channel bit allocation | Channel distortion (e.g. squared error) | Channel capacity (constraint)   |
| Van den Berg & Ma (present study)                     | Mean encoding precision            | Behavioral task accuracy                | Neural activity (cost)          |
| <b>Rational inattention in consumer choice</b>        |                                    |                                         |                                 |
| Chris A. Sims                                         | Distribution of attention          | Channel distortion (e.g. squared error) | Channel capacity (constraint)   |

731 **Extensions to other domains**

732 Our theory might apply beyond working memory tasks. In particular, it has been speculated that  
733 the selectivity of attention arises from a need to balance performance against the costs associated  
734 with spiking (Pestilli & Carrasco 2005; Lennie 2003). Our theory provides a normative formalism  
735 to test this speculation and may thus explain set size effects in attention tasks (Lindsay et al.  
736 1968; Shaw 1980; Ma & Huang 2009).

737 Furthermore, developmental studies have found that that working memory capacity  
738 estimates change with age (Simmering & Perone 2012; Simmering 2012). Viewed from the  
739 perspective of our proposed theory, this raises the question why the optimal trade-off between  
740 behavioral and neural cost would change with age. A speculative answer is that a subject's coding  
741 efficiency – formalized by the inverse of parameter  $\alpha$  in Eq. (7) – may improve during childhood:  
742 an increase in coding efficiency reduces the neural cost per unit of precision, which shifts the  
743 optimal amount of resource to use for encoding to larger values. Neuroimaging studies might  
744 provide insight into whether and how coding efficiency changes with age, e.g. by estimating the  
745 amount of neural activity required per unit of precision in memory representations.

746

747 **Broader context**

748 Our work fits into a broader tradition of normative theories in psychology and neuroscience  
749 (Table 2). The main motivation for such theories is to reach a deeper level of understanding by  
750 analyzing a system in the context of the ecological needs and constraints under which it evolved.  
751 Besides work on ideal-observer decision rules (Green & Swets 1966; Körding 2007; Geisler  
752 2011; Shen & Ma 2016) and on resource-limited approximations to optimal inference (Gershman  
753 et al. 2015; Griffiths et al. 2015; Vul & Pashler 2014; Vul et al. 2009), normative approaches  
754 have also been used at the level of neural coding. For example, properties of receptive fields  
755 (Vincent et al. 2005; Liu et al. 2009; Olshausen & Field 1996), tuning curves (Attneave 1954;  
756 Barlow 1961; Ganguli & Simoncelli 2010), neural architecture (Cherniak 1994; Chklovskii et al.  
757 2002), receptor performance (Laughlin 2001), and neural network modularity (Clune et al. 2013)  
758 have been explained as outcomes of optimization under either a cost or a hard constraint (on total  
759 neural firing, sparsity, or wiring length), and are thus mathematically closely related to the theory  
760 presented here. However, a difference concerns the timescale at which the optimization takes  
761 place: while optimization in the context of neural coding is typically thought to take place at the



762 timescale over which the statistics of the environment change or a developmental timescale, the  
763 theory that we presented here could optimize on a trial-by-trial basis to follow changes in task  
764 properties.

765 We already mentioned the information-theory models of working memory developed by  
766 Chris R. Sims et al. A very similar framework has been proposed by Chris A. Sims in behavioral  
767 economics, who used information theory to formalize his hypothesis of "rational inattention", i.e.,  
768 the hypothesis that consumers make optimal decisions under a fixed budget of attentional  
769 resources that can be allocated to process economic data (Sims 2003). The model presented here  
770 differs from these two approaches in two important ways. First, similar to early models of visual  
771 working memory limitations, they postulate a fixed total amount of resources (formalized as  
772 channel capacity), which is a constraint rather than a cost. Second, even if it had been a cost, it  
773 would have been the expected value of a log probability ratio. Unlike neural spike count, a log  
774 probability ratio does not obviously map to a biologically meaningful cost on a single-trial level.  
775 Nevertheless, recent work has attempted to bridge rational inattention and attention in a  
776 psychophysical setting (Caplin et al. 2018).

777

## 778 **MATERIALS AND METHODS**

779

### 780 **Data and code sharing**

781 All data analyzed in this paper and model fitting code are available at [url to be inserted].

782

### 783 **Statistical analyses**

784 Bayesian t-tests were performed using the JASP software package (JASP\_Team 2017) with the  
785 scale parameter of the Cauchy prior set to its default value of 0.707.

786

### 787 **Model fitting**

788 We used a Bayesian optimization method (Acerbi & Ma 2017) to find the parameter vector  
789  $\theta = \{\beta, \lambda, \tau\}$  that maximizes the log likelihood function,  $\sum_{i=1}^n \log p(\varepsilon_i; p_i, \theta)$ , where  $n$  is the  
790 number of trials in the subject's data set,  $\varepsilon_i$  the estimation error on the  $i^{\text{th}}$  trial, and  $p_i$  the probing  
791 probability of the probed item on that trial. To reduce the risk of converging into a local



792 maximum, initial parameter estimates were chosen based on a coarse grid search over a large  
793 range of parameter values. The predicted estimation error distribution for a given parameter  
794 vector  $\theta$  and probing probability  $p_i$  was computed as follows. First,  $\bar{J}_{\text{optimal}}$  was computed by  
795 applying Matlab's `fminsearch` function to Eq. (11). Thereafter, the gamma distribution over  $J$   
796 (with mean  $\bar{J}_{\text{optimal}}$  and shape parameter  $\tau$ ) was discretized into 20 equal-probability bins. The  
797 predicted (Von Mises) estimation error distribution was then computed under the central value of  
798 each bin. Finally, these 20 predicted distributions were averaged. We verified that increasing the  
799 number of bins used in the numerical approximation of the integral over  $J$  did not substantially  
800 affect the results.

801

### 802 **Model comparison using cross-validation**

803 In the cross-validation analysis, we fitted the models in the same way as described above, but  
804 using only 80% of the data. We did this five times, each time leaving out a different subset of  
805 20% the data (in the first run we left out trials 1, 6, 11, etc; in the second run we left out trials 2,  
806 7, 12, etc; etc). At the end of each run, we used the maximum-likelihood parameter estimates to  
807 compute the log likelihood of the 20% of trials that were left out. These log likelihood values  
808 were then combined across the five runs to give an overall cross-validated log likelihood value  
809 for each model.

810

### 811 **ACKNOWLEDGMENTS**

812 This work was funded by grant R01EY020958 from the National Institutes of Health, grant 2015-  
813 00371 by the Swedish Research Council, and grant INCA 600398 by Marie Skłodowska Curie  
814 Actions. We thank all authors of the papers listed in Table 1 for making their data available.

815

### 816 **REFERENCES**

- 817 Abbott, L.F. & Dayan, P., 1999. The effect of correlated variability on the accuracy of a  
818 population code. *Neural computation*, 11(1), pp.91–101.
- 819 Acerbi, L. & Ma, W.J., 2017. Practical Bayesian Optimization for Model Fitting with Bayesian  
820 Adaptive Direct Search. In *Advances in Neural Information Processing Systems 30*. pp.  
821 1836–1846. Available at:  
822 <http://arxiv.org/abs/1705.04405> <https://papers.nips.cc/paper/6780-practical-bayesian->

- 823 optimization-for-model-fitting-with-bayesian-adaptive-direct-search.
- 824 Adam, K.C.S., Vogel, E.K. & Awh, E., 2017. Clear evidence for item limits in visual working  
825 memory. *Cognitive Psychology*.
- 826 Akaike, H., 1974. A new look at the statistical model identification. *IEEE Transactions on*  
827 *Automatic Control*, 19(6).
- 828 Attneave, F., 1954. Some informational aspects of visual perception. *Psychological review*, 61(3),  
829 pp.183–193.
- 830 Attwell, D. & Laughlin, S.B., 2001. An energy budget for signaling in the grey matter of the  
831 brain. *Journal of cerebral blood flow and metabolism : official journal of the International*  
832 *Society of Cerebral Blood Flow and Metabolism*, 21(10), pp.1133–1145.
- 833 Bae, G. et al., 2014. Stimulus-specific variability in color working memory with delayed  
834 estimation. *Journal of Vision*, 14(4), pp.1–23.
- 835 Balan, P.F. et al., 2008. Neuronal correlates of the set-size effect in monkey lateral intraparietal  
836 area. *PLoS Biology*.
- 837 Barlow, H.B.H., 1961. Possible principles underlying the transformation of sensory messages. In  
838 *Sensory Communication*. pp. 217–234. Available at:  
839 [http://www.trin.cam.ac.uk/horacebarlow/21.pdf%5Cnhttp://redwood.berkeley.edu/w/images/  
840 f/fd/02-barlow-pr-1954.pdf](http://www.trin.cam.ac.uk/horacebarlow/21.pdf%5Cnhttp://redwood.berkeley.edu/w/images/f/fd/02-barlow-pr-1954.pdf).
- 841 Basso, M. a & Wurtz, R.H., 1998. Modulation of neuronal activity in superior colliculus by  
842 changes in target probability. *The Journal of neuroscience : the official journal of the*  
843 *Society for Neuroscience*.
- 844 Bays, P.M., 2014. Noise in neural populations accounts for errors in working memory. *The*  
845 *Journal of neuroscience : the official journal of the Society for Neuroscience*, 34(10),  
846 pp.3632–45.
- 847 Bays, P.M., Catalao, R.F.G. & Husain, M., 2009. The precision of visual working memory is set  
848 by allocation of a shared resource. *Journal of vision*, 9(10), p.7.1-11.
- 849 Bays, P.M. & Husain, M., 2008. Dynamic shifts of limited working memory resources in human  
850 vision. *Science*, 321(5890), pp.851–4.
- 851 Beck, J.M. et al., 2012. Not Noisy, Just Wrong: The Role of Suboptimal Inference in Behavioral  
852 Variability. *Neuron*, 74(1), pp.30–39.
- 853 Van Den Berg, R. et al., 2012. *Variability in encoding precision accounts for visual short-term*

- 854 *memory limitations,*
- 855 van den Berg, R., Awh, E. & Ma, W.J., 2014. Factorial comparison of working memory models.
- 856 *Psychological review*, 121(1), pp.124–49.
- 857 van den Berg, R., Yoo, A.H. & Ma, W.J., 2017. Fechner’s law in metacognition: A quantitative
- 858 model of visual working memory confidence. *Psychological Review*, 124(2).
- 859 Blake, R., Cepeda, N.J. & Hiris, E., 1997. Memory for visual motion. *Journal of experimental*
- 860 *psychology Human perception and performance*, 23, pp.353–369. Available at:
- 861 <http://psycnet.apa.org/index.cfm?fa=search.displayRecord&uid=1997-03584-004>.
- 862 Caplin, A., Csaba, D. & Leahy, J., 2018. *Rational inattention and psychometrics*, Available at:
- 863 [https://18798-presscdn-pagely.netdna-ssl.com/andrewcaplin/wp-](https://18798-presscdn-pagely.netdna-ssl.com/andrewcaplin/wp-content/uploads/sites/8350/2018/03/Rational-Inattention-and-Psychometrics.pdf)
- 864 [content/uploads/sites/8350/2018/03/Rational-Inattention-and-Psychometrics.pdf](https://18798-presscdn-pagely.netdna-ssl.com/andrewcaplin/wp-content/uploads/sites/8350/2018/03/Rational-Inattention-and-Psychometrics.pdf).
- 865 Carandini, M. & Heeger, D., 2012. Normalization as a canonical neural computation. *Nature*
- 866 *Reviews Neuroscience*, (November), pp.1–12. Available at:
- 867 [http://www.nature.com/nrn/journal/v13/n1/abs/nrn3136.html%5Cnhttp://discovery.ucl.ac.uk](http://www.nature.com/nrn/journal/v13/n1/abs/nrn3136.html%5Cnhttp://discovery.ucl.ac.uk/1332718/)
- 868 [/1332718/](http://www.nature.com/nrn/journal/v13/n1/abs/nrn3136.html%5Cnhttp://discovery.ucl.ac.uk/1332718/).
- 869 Cherniak, C., 1994. Component placement optimization in the brain. *The Journal of*
- 870 *neuroscience : the official journal of the Society for Neuroscience*, 14(April), pp.2418–2427.
- 871 Chklovskii, D.B., Schikorski, T. & Stevens, C.F., 2002. Wiring optimization in cortical circuits.
- 872 *Neuron*, 34(3), pp.341–347.
- 873 Christie, S.T. & Schrater, P., 2015. Cognitive cost as dynamic allocation of energetic resources.
- 874 *Frontiers in Neuroscience*, 9(JUL).
- 875 Churchland, A.K., Kiani, R. & Shadlen, M.N., 2008. Decision-making with multiple alternatives.
- 876 *Nature Neuroscience*.
- 877 Clune, J., Mouret, J.-B. & Lipson, H., 2013. The evolutionary origins of modularity. *Proceedings*
- 878 *of the Royal Society B: Biological Sciences*, 280(1755), pp.20122863–20122863. Available
- 879 at: <http://rspb.royalsocietypublishing.org/cgi/doi/10.1098/rspb.2012.2863>.
- 880 Cover, T.M. & Thomas, J.A., 2005. *Elements of Information Theory*,
- 881 Devkar, D.T. & Wright, A.A., 2015. The same type of visual working memory limitations in
- 882 humans and monkeys. *Journal of Vision*, 13(2015), pp.1–18.
- 883 Donkin, C. et al., 2016. Resources masquerading as slots: Flexible allocation of visual working
- 884 memory. *Cognitive Psychology*, 85, pp.30–42.

- 885 Drugowitsch, J. et al., 2016. Computational Precision of Mental Inference as Critical Source of  
886 Human Choice Suboptimality. *Neuron*, 92(6), pp.1398–1411.
- 887 Elmore, L.C. et al., 2011. Visual short-term memory compared in rhesus monkeys and humans.  
888 *Current Biology*, 21(11), pp.975–979.
- 889 Emrich, S.M., Lockhart, H.A. & Al-Aidroos, N., 2017. Attention mediates the flexible allocation  
890 of visual working memory resources. *Journal of Experimental Psychology: Human  
891 Perception and Performance*, 43(7), pp.1454–1465.
- 892 Faisal, A.A., Selen, L.P.J. & Wolpert, D.M., 2008. Noise in the nervous system. *Nature reviews.  
893 Neuroscience*, 9, pp.292–303.
- 894 Fougnie, D. et al., 2016. Strategic trade-offs between quantity and quality in working memory.  
895 *Journal of Experimental Psychology: Human Perception and Performance*, 42(8), pp.1231–  
896 1240.
- 897 Fougnie, D., Suchow, J.W. & Alvarez, G.A., 2012. Variability in the quality of visual working  
898 memory. *Nature communications*, 3, p.1229.
- 899 Ganguli, D. & Simoncelli, E.P., 2010. Implicit encoding of prior probabilities in optimal neural  
900 populations. *Advances in neural information processing systems*, 2010(December 2010),  
901 pp.658–666. Available at:  
902 [http://www.pubmedcentral.nih.gov/articlerender.fcgi?artid=4209846&tool=pmcentrez&rend  
903 ertype=abstract](http://www.pubmedcentral.nih.gov/articlerender.fcgi?artid=4209846&tool=pmcentrez&rendertype=abstract).
- 904 Geisler, W.S., 2011. Contributions of ideal observer theory to vision research. *Vision Research*,  
905 51(7), pp.771–781.
- 906 Gershman, S.J., Horvitz, E.J. & Tenenbaum, J.B., 2015. Computational rationality: A converging  
907 paradigm for intelligence in brains, minds, and machines. *Science*, 349(6245), pp.273–278.
- 908 Girshick, A.R., Landy, M.S. & Simoncelli, E.P., 2011. Cardinal rules: visual orientation  
909 perception reflects knowledge of environmental statistics. *Nature neuroscience*, 14(7),  
910 pp.926–932.
- 911 Green, D.M. & Swets, J.A., 1966. Signal detection theory and psychophysics. *Society*, 1, p.521.
- 912 Griffiths, T.L., Lieder, F. & Goodman, N.D., 2015. Rational use of cognitive resources: Levels of  
913 analysis between the computational and the algorithmic. *Topics in Cognitive Science*, 7(2),  
914 pp.217–229.
- 915 JASP\_Team, 2017. JASP (Version 0.8.2) [Computer program].

- 916 Keshvari, S., van den Berg, R. & Ma, W.J., 2013. No Evidence for an Item Limit in Change  
917 Detection. *PLoS Computational Biology*, 9(2).
- 918 Keshvari, S., van den Berg, R. & Ma, W.J., 2012. Probabilistic computation in human perception  
919 under variability in encoding precision. *PLoS ONE*, 7(6).
- 920 Klyszejko, Z., Rahmati, M. & Curtis, C.E., 2014. Attentional priority determines working  
921 memory precision. *Vision Research*, 105, pp.70–76.
- 922 Körding, K., 2007. Decision theory: what “should” the nervous system do? *Science (New York,*  
923 *N.Y.)*, 318, pp.606–610.
- 924 Laughlin, S.B., 2001. Energy as a constraint on the coding and processing of sensory information.  
925 *Current Opinion in Neurobiology*, 11(4), pp.475–480.
- 926 Lennie, P., 2003. The cost of cortical computation. *Current Biology*, 13(6), pp.493–497.
- 927 Lindsay, P.H., Taylor, M.M. & Forbes, S.M., 1968. Attention and multidimensional  
928 discrimination. *Perception & Psychophysics* 1, 4(2), pp.113–117.
- 929 Liu, Y.S., Stevens, C.F. & Sharpee, T., 2009. Predictable irregularities in retinal receptive fields.  
930 *Proceedings of the National Academy of Sciences*, 106(38), pp.16499–16504. Available at:  
931 <http://eutils.ncbi.nlm.nih.gov/entrez/eutils/elink.fcgi?dbfrom=pubmed&id=19805327&retmode=ref&cmd=prlinks%5Cnpapers3://publication/doi/10.1073/pnas.0908926106>.
- 932
- 933 Luck, S.J. & Vogel, E.K., 1997. The capacity of visual working memory for features and  
934 conjunctions. *Nature*, 390(6657), pp.279–281.
- 935 Luck, S.J. & Vogel, E.K., 2013. Visual working memory capacity: From psychophysics and  
936 neurobiology to individual differences. *Trends in Cognitive Sciences*, 17(8), pp.391–400.
- 937 Ly, A. et al., 2015. A tutorial on Fisher information. *Journal of Mathematical Psychology*.
- 938 Ma, W.J. et al., 2006. Bayesian inference with probabilistic population codes. *Nature*  
939 *neuroscience*, 9(11), pp.1432–1438.
- 940 Ma, W.J. & Huang, W., 2009. No capacity limit in attentional tracking: evidence for probabilistic  
941 inference under a resource constraint. *Journal of vision*, 9(11), p.3.1-30.
- 942 Ma, W.J., Husain, M. & Bays, P.M., 2014. Changing concepts of working memory. *Nature*  
943 *neuroscience*, 17(3), pp.347–56.
- 944 Mazyar, H., van den Berg, R. & Ma, W.J., 2012. Does precision decrease with set size? *Journal*  
945 *of vision*, 12(6), p.10.
- 946 Nassar, M.R., Helmers, J.C. & Frank, M., 2018. *Chunking as a rational strategy for lossy data*

- 947           *compression in visual working memory,*
- 948 Oberauer, K. et al., 2016. What Limits Working Memory Capacity? *Psychological Bulletin*,
- 949           142(March), pp.758–799. Available at:
- 950           <http://doi.apa.org/getdoi.cfm?doi=10.1037/bul0000046>.
- 951 Oberauer, K. & Lin, H., 2017. An Interference Model of Visual Working Memory. *Psychological*
- 952           *Review*, 124(1), pp.21–59. Available at:
- 953           <http://doi.apa.org/getdoi.cfm?doi=10.1037/rev0000044>.
- 954 Olshausen, B.A. & Field, D.J., 1996. Emergence of simple-cell receptive field properties by
- 955           learning a sparse code for natural images. *Nature*, 381(6583), pp.607–609. Available at:
- 956           <http://dx.doi.org/10.1038/381607a0>.
- 957 Orhan, A.E. et al., 2014. The adaptive nature of visual working memory. *Current Directions in*
- 958           *Psychological Science*, 23(3), pp.164–170. Available at:
- 959           <http://cdp.sagepub.com/lookup/doi/10.1177/0963721414529144>.
- 960 Palmer, J., 1994. Set-size effects in visual search: The effect of attention is independent of the
- 961           stimulus for simple tasks. *Vision Research*, 34(13).
- 962 Palmer, J., Ames, C.T. & Lindsey, D.T., 1993. Measuring the effect of attention on simple visual
- 963           search. *Journal of experimental psychology. Human perception and performance*, 19(1),
- 964           pp.108–130.
- 965 Paradiso, M. a, 1988. A theory for the use of visual orientation information which exploits the
- 966           columnar structure of striate cortex. *Biological cybernetics*, 58(1), pp.35–49.
- 967 Pestilli, F. & Carrasco, M., 2005. Attention enhances contrast sensitivity at cued and impairs it at
- 968           uncued locations. *Vision Research*, 45(14), pp.1867–1875.
- 969 Prinzmetal, W. et al., 1998. Phenomenology of attention: I. Color, location, orientation, and
- 970           spatial frequency. *Journal of Experimental Psychology: Human Perception and*
- 971           *Performance*, 24(1), pp.261–282. Available at:
- 972           <http://doi.apa.org/getdoi.cfm?doi=10.1037/0096-1523.24.1.261>.
- 973 Reynolds, J.H. & Heeger, D.J., 2009. The Normalization Model of Attention. *Neuron*, 61(2),
- 974           pp.168–185.
- 975 Rouder, J.N. et al., 2008. An assessment of fixed-capacity models of visual working memory.
- 976           *Proceedings of the National Academy of Sciences of the United States of America*, 105(16),
- 977           pp.5975–5979.



- 978 Seung, H.S. & Sompolinsky, H., 1993. Simple models for reading neuronal population codes.  
979 *Proc.Natl.Acad.Sci.*, 90(22), pp.10749–10753. Available at:  
980 [http://www.pubmedcentral.nih.gov/articlerender.fcgi?artid=47855&tool=pmcentrez&rendert](http://www.pubmedcentral.nih.gov/articlerender.fcgi?artid=47855&tool=pmcentrez&rendertype=abstract)  
981 [ype=abstract.](http://www.pubmedcentral.nih.gov/articlerender.fcgi?artid=47855&tool=pmcentrez&rendertype=abstract)
- 982 Sewell, D.K., Lilburn, S.D. & Smith, P.L., 2014. An information capacity limitation of visual  
983 short-term memory. *J Exp Psychol Hum Percept Perform*, 40(6), pp.2214–2242. Available  
984 at: [http://www.ncbi.nlm.nih.gov/pubmed/25222469.](http://www.ncbi.nlm.nih.gov/pubmed/25222469)
- 985 Shaw, M.L., 1980. Identifying attentional and decision-making components in information  
986 processing. In R. S. Nickerson, ed. *Attention and performance VIII*. Hillsdale, NJ, NJ:  
987 Erlbaum, pp. 277–296.
- 988 Shen, S. & Ma, W.J., 2016. A detailed comparison of optimality and simplicity in perceptual  
989 decision making. *Psychological Review*, 123(4), pp.452–480. Available at:  
990 [http://doi.apa.org/getdoi.cfm?doi=10.1037/rev0000028.](http://doi.apa.org/getdoi.cfm?doi=10.1037/rev0000028)
- 991 Shenhav, A. et al., 2017. Toward a Rational and Mechanistic Account of Mental Effort. *Annual*  
992 *Review of Neuroscience*, 40(1), pp.99–124. Available at:  
993 [http://www.annualreviews.org/doi/10.1146/annurev-neuro-072116-031526.](http://www.annualreviews.org/doi/10.1146/annurev-neuro-072116-031526)
- 994 Shin, H. & Ma, W.J., 2016. Crowdsourced single-trial probes of visual working memory for  
995 irrelevant features Laboratory experiments. *Journal of Vision*, 16(5)(10), pp.1–8.
- 996 Simmering, V.R., 2012. The development of visual working memory capacity during early  
997 childhood. *Journal of Experimental Child Psychology*, 111(4), pp.695–707.
- 998 Simmering, V.R. & Perone, S., 2012. Working memory capacity as a dynamic process. *Frontiers*  
999 *in psychology*, 3(January), p.567. Available at:  
1000 [http://www.pubmedcentral.nih.gov/articlerender.fcgi?artid=3538562&tool=pmcentrez&rend](http://www.pubmedcentral.nih.gov/articlerender.fcgi?artid=3538562&tool=pmcentrez&rendertype=abstract)  
1001 [ertype=abstract.](http://www.pubmedcentral.nih.gov/articlerender.fcgi?artid=3538562&tool=pmcentrez&rendertype=abstract)
- 1002 Sims, C.A., 2003. Implications of rational inattention. *Journal of Monetary Economics*, 50(3),  
1003 pp.665–690.
- 1004 Sims, C.R., 2016. Rate–distortion theory and human perception. *Cognition*, 152, pp.181–198.
- 1005 Sims, C.R., 2015. The cost of misremembering: Inferring the loss function in visual working  
1006 memory. *Journal of Vision*, 15(3), p.2. Available at:  
1007 [http://jov.arvojournals.org/Article.aspx?articleid=2213283.](http://jov.arvojournals.org/Article.aspx?articleid=2213283)
- 1008 Sims, C.R., Jacobs, R.A. & Knill, D.C., 2012. An ideal observer analysis of visual working

- 1009 memory. *Psychological review*, 119(4), pp.807–30.
- 1010 Smith, P.L., 2015. The Poisson shot noise model of visual short-term memory and choice  
1011 response time: Normalized coding by neural population size. *Journal of Mathematical*  
1012 *Psychology*, 66, pp.41–52.
- 1013 Sterling, P. & Laughlin, S., 2015. *Principles of neural design.*, MIT Press.
- 1014 Todd, J.J. & Marois, R., 2004. Capacity limit of visual short-term memory in human posterior  
1015 parietal cortex. *Nature*, 428(6984), pp.751–754.
- 1016 Vincent, B.T. et al., 2005. Is the early visual system optimised to be energy efficient? *Network*,  
1017 16, pp.175–190.
- 1018 Vul, E. et al., 2009. Explaining human multiple object tracking as resource-constrained  
1019 approximate inference in a dynamic probabilistic model. *Advances in Neural Information*  
1020 *Processing Systems (NIPS)*, 22, pp.1–9. Available at:  
1021 [http://books.nips.cc/papers/files/nips22/NIPS2009\\_0980.pdf](http://books.nips.cc/papers/files/nips22/NIPS2009_0980.pdf).
- 1022 Vul, E. & Pashler, H., 2014. Measuring the Crowd Within. *Psychological Science*, 19(7), pp.645–  
1023 647.
- 1024 Wei, X.-X. & Stocker, A.A., 2015. A Bayesian observer model constrained by efficient coding  
1025 can explain “anti-Bayesian” percepts. *Nature Neuroscience*, 18(10), pp.1509–1517.  
1026 Available at: <http://www.nature.com/doi/10.1038/nn.4105>.
- 1027 Wei, Z., Wang, X.-J. & Wang, D.-H., 2012. From Distributed Resources to Limited Slots in  
1028 Multiple-Item Working Memory: A Spiking Network Model with Normalization. *The*  
1029 *Journal of Neuroscience*, 32(33), pp.11228–11240. Available at:  
1030 <http://www.jneurosci.org/content/32/33/11228>  
1031 [.full.pdf](http://www.jneurosci.org/content/32/33/11228.full.pdf)  
1032 [.http://www.ncbi.nlm.nih.gov/pubmed/22895707](http://www.ncbi.nlm.nih.gov/pubmed/22895707).
- 1033 Wilken, P. & Ma, W.J., 2004. A detection theory account of change detection. *Journal of vision*,  
1034 4(12), pp.1120–35.
- 1035 Yi, D.-J. et al., 2004. Neural fate of ignored stimuli: dissociable effects of perceptual and working  
1036 memory load. *Nature Neuroscience*, 7(9), pp.992–996. Available at:  
1037 <http://www.nature.com/doi/10.1038/nn1294>.
- 1038 Zhang, W. & Luck, S.J., 2008. Discrete fixed-resolution representations in visual working  
1039 memory. *Nature*, 453(7192), pp.233–235.



1040 Zhang, W. & Luck, S.J., 2011. The Number and Quality of Representations in Working Memory.  
1041 *Psychological Science*, 22(11), pp.1434–1441. Available at:  
1042 <http://journals.sagepub.com/doi/10.1177/0956797611417006>.  
1043
